# Supplementary material for: The proteome of perilymph in patients with vestibular schwannoma. A possibility to identify biomarkers for tumor associated hearing loss?
Source: PLoS One. 2018 Jun 1;13(6):e0198442. doi: 10.1371/journal.pone.0198442 (PMC5983529; doi:10.1371/journal.pone.0198442)
Supplement: S1 Table — (XLSX) [file pone.0198442.s001.xlsx]

## Sheet: S1 Table
S1 Table. MaxQuant protein identification and quantification
Protein IDs	Majority protein IDs	Protein names	Gene names	Fasta headers	Signal intensity PL-sample 1	Signal intensity PL-sample 2	Signal intensity PL-sample 3	Signal intensity PL-sample 4	Signal intensity PL-sample 5	Signal intensity PL-sample 6	Signal intensity PL-sample 7	Signal intensity PL-sample 8	Signal intensity PL-sample 9	Signal intensity PL-sample 10	Signal intensity PL-sample 11	Signal intensity PL-sample 12	Signal intensity PL-sample 13	Signal intensity PL-sample 14	Signal intensity PL-sample 15	Identified in n samples
P43652;CON__REFSEQ:XP_585019	P43652	Afamin	AFM	sp|P43652|AFAM_HUMAN Afamin OS=Homo sapiens GN=AFM PE=1 SV=1	590500000	554640000	2540200000	1525600000	1545600000	3706500000	1338100000	1005500000	974090000	790090000	412590000	5702600000	4092600000	1620400000	1676400000	15
P02763	P02763	Alpha-1-acid glycoprotein 1	ORM1	sp|P02763|A1AG1_HUMAN Alpha-1-acid glycoprotein 1 OS=Homo sapiens GN=ORM1 PE=1 SV=1	2160900000	2473000000	11010000000	11858000000	9088300000	11651000000	5559000000	5908900000	11831000000	8376300000	4745600000	32349000000	28379000000	8724300000	19342000000	15
P19652	P19652	Alpha-1-acid glycoprotein 2	ORM2	sp|P19652|A1AG2_HUMAN Alpha-1-acid glycoprotein 2 OS=Homo sapiens GN=ORM2 PE=1 SV=2	428220000	809570000	4568700000	2020700000	1478700000	1315200000	2225800000	1612300000	4647800000	4663100000	4180300000	6700100000	5938000000	1114200000	7527300000	15
P01011	P01011	Alpha-1-antichymotrypsin;Alpha-1-antichymotrypsin His-Pro-less	SERPINA3	sp|P01011|AACT_HUMAN Alpha-1-antichymotrypsin OS=Homo sapiens GN=SERPINA3 PE=1 SV=2	1991100000	3329800000	8968100000	2807600000	1147200000	9333900000	1701300000	954790000	1537800000	2040900000	1204700000	11799000000	9057200000	4428200000	7245700000	15
P01009	P01009	Alpha-1-antitrypsin;Short peptide from AAT	SERPINA1	sp|P01009|A1AT_HUMAN Alpha-1-antitrypsin OS=Homo sapiens GN=SERPINA1 PE=1 SV=3	35647000000	28214000000	100290000000	53758000000	33942000000	71670000000	41862000000	14769000000	32508000000	53662000000	23570000000	109500000000	89385000000	65792000000	85115000000	15
P04217	P04217	Alpha-1B-glycoprotein	A1BG	sp|P04217|A1BG_HUMAN Alpha-1B-glycoprotein OS=Homo sapiens GN=A1BG PE=1 SV=4	33199000000	34590000000	26918000000	42800000000	46529000000	18488000000	18045000000	95566000000	47899000000	61083000000	93498000000	18344000000	12837000000	22539000000	17090000000	15
P02765;CON__P12763	P02765	Alpha-2-HS-glycoprotein;Alpha-2-HS-glycoprotein chain A;Alpha-2-HS-glycoprotein chain B	AHSG	sp|P02765|FETUA_HUMAN Alpha-2-HS-glycoprotein OS=Homo sapiens GN=AHSG PE=1 SV=1	20857000000	15211000000	35669000000	31661000000	31543000000	32833000000	24895000000	31307000000	35668000000	38318000000	35966000000	16974000000	13291000000	22062000000	21643000000	15
P01023	P01023	Alpha-2-macroglobulin	A2M	sp|P01023|A2MG_HUMAN Alpha-2-macroglobulin OS=Homo sapiens GN=A2M PE=1 SV=3	52801000000	57368000000	15743000000	12903000000	29148000000	51687000000	34067000000	56909000000	32396000000	41645000000	64579000000	21245000000	50692000000	60806000000	96227000000	15
P01008	P01008	Antithrombin-III	SERPINC1	sp|P01008|ANT3_HUMAN Antithrombin-III OS=Homo sapiens GN=SERPINC1 PE=1 SV=1	3446600000	3267700000	14044000000	5415300000	5336600000	14034000000	5854400000	5159600000	9706200000	6111800000	5414300000	11673000000	8701600000	14743000000	9434500000	15
P02647;CON__P15497	P02647	Apolipoprotein A-I;Proapolipoprotein A-I;Truncated apolipoprotein A-I	APOA1	sp|P02647|APOA1_HUMAN Apolipoprotein A-I OS=Homo sapiens GN=APOA1 PE=1 SV=1	53635000000	61177000000	106200000000	60813000000	84785000000	137520000000	105010000000	44633000000	74628000000	66495000000	76380000000	152430000000	156750000000	139140000000	235090000000	15
P02652	P02652	Apolipoprotein A-II;Proapolipoprotein A-II;Truncated apolipoprotein A-II	APOA2	sp|P02652|APOA2_HUMAN Apolipoprotein A-II OS=Homo sapiens GN=APOA2 PE=1 SV=1	8452400000	9191100000	22707000000	19150000000	30175000000	22518000000	32308000000	14842000000	25924000000	21282000000	31417000000	25208000000	46666000000	35251000000	55883000000	15
P06727;CON__Q32PJ2	P06727	Apolipoprotein A-IV	APOA4	sp|P06727|APOA4_HUMAN Apolipoprotein A-IV OS=Homo sapiens GN=APOA4 PE=1 SV=3	10153000000	13705000000	20233000000	23429000000	34809000000	41412000000	27603000000	29731000000	30377000000	22952000000	30864000000	19200000000	21878000000	22764000000	20448000000	15
P02656	P02656	Apolipoprotein C-III	APOC3	sp|P02656|APOC3_HUMAN Apolipoprotein C-III OS=Homo sapiens GN=APOC3 PE=1 SV=1	2460600000	4932400000	719890000	3603800000	10254000000	6896300000	10507000000	16239000000	6133500000	5522100000	22262000000	564870000	1264000000	5824900000	7656800000	15
P05090	P05090	Apolipoprotein D	APOD	sp|P05090|APOD_HUMAN Apolipoprotein D OS=Homo sapiens GN=APOD PE=1 SV=1	70337000000	105340000000	52870000000	37353000000	20819000000	54530000000	22073000000	26181000000	37005000000	22222000000	22346000000	64664000000	47086000000	23601000000	18909000000	15
P02649;CON__Q03247	P02649	Apolipoprotein E	APOE	sp|P02649|APOE_HUMAN Apolipoprotein E OS=Homo sapiens GN=APOE PE=1 SV=1	6203400000	7295700000	4820100000	2654700000	7320400000	5377900000	7464000000	5564300000	6904500000	4632200000	8570400000	3129100000	6136900000	4559400000	4304800000	15
P02749;CON__P17690	P02749	Beta-2-glycoprotein 1	APOH	sp|P02749|APOH_HUMAN Beta-2-glycoprotein 1 OS=Homo sapiens GN=APOH PE=1 SV=3	1717100000	1710500000	6953800000	9726100000	13496000000	4719800000	7840300000	12756000000	10072000000	8004800000	8854400000	8107400000	5281200000	6107100000	5678100000	15
P00450;CON__ENSEMBL:ENSBTAP00000031900	P00450	Ceruloplasmin	CP	sp|P00450|CERU_HUMAN Ceruloplasmin OS=Homo sapiens GN=CP PE=1 SV=1	9746800000	11892000000	16653000000	18296000000	13909000000	22218000000	13066000000	12726000000	11258000000	11171000000	12920000000	18420000000	23587000000	14974000000	21449000000	15
P10909;CON__P17697	P10909	Clusterin;Clusterin beta chain;Clusterin alpha chain	CLU	sp|P10909|CLUS_HUMAN Clusterin OS=Homo sapiens GN=CLU PE=1 SV=1	4091700000	6638000000	14486000000	9417300000	5137500000	6249400000	6796200000	1720800000	6298700000	5551800000	4270300000	9612500000	8144400000	6845700000	8439300000	15
P02747	P02747	Complement C1q subcomponent subunit C	C1QC	sp|P02747|C1QC_HUMAN Complement C1q subcomponent subunit C OS=Homo sapiens GN=C1QC PE=1 SV=3	1034100000	1109200000	524080000	394980000	1008400000	353490000	2061300000	892720000	953860000	488230000	1816500000	279620000	491920000	1724100000	737220000	15
P09871	P09871	Complement C1s subcomponent;Complement C1s subcomponent heavy chain;Complement C1s subcomponent light chain	C1S	sp|P09871|C1S_HUMAN Complement C1s subcomponent OS=Homo sapiens GN=C1S PE=1 SV=1	221900000	349620000	350800000	567660000	636480000	239230000	709000000	439940000	586640000	854690000	647110000	222900000	178670000	359060000	430020000	15
P06681	P06681	Complement C2;Complement C2b fragment;Complement C2a fragment	C2	sp|P06681|CO2_HUMAN Complement C2 OS=Homo sapiens GN=C2 PE=1 SV=2	464680000	601800000	956310000	561900000	597540000	453780000	721570000	1386400000	1117700000	715080000	1996800000	787250000	234800000	548830000	574140000	15
P01024;CON__Q2UVX4;O95568	P01024	Complement C3;Complement C3 beta chain;C3-beta-c;Complement C3 alpha chain;C3a anaphylatoxin;Acylation stimulating protein;Complement C3b alpha chain;Complement C3c alpha chain fragment 1;Complement C3dg fragment;Complement C3g fragment;Complement C3d fragment;Complement C3f fragment;Complement C3c alpha chain fragment 2	C3	sp|P01024|CO3_HUMAN Complement C3 OS=Homo sapiens GN=C3 PE=1 SV=2	39584000000	37117000000	22370000000	17027000000	27279000000	35793000000	24908000000	15209000000	21121000000	17272000000	20357000000	60356000000	78606000000	34029000000	56672000000	15
P0C0L5	P0C0L5	Complement C4-B;Complement C4 beta chain;Complement C4-B alpha chain;C4a anaphylatoxin;C4b-B;C4d-B;Complement C4 gamma chain	C4B	sp|P0C0L5|CO4B_HUMAN Complement C4-B OS=Homo sapiens GN=C4B PE=1 SV=2	31006000000	29057000000	15689000000	22278000000	26911000000	17568000000	15964000000	29342000000	18681000000	14575000000	42482000000	25769000000	19216000000	18275000000	18397000000	15
P10643	P10643	Complement component C7	C7	sp|P10643|CO7_HUMAN Complement component C7 OS=Homo sapiens GN=C7 PE=1 SV=2	3091200000	4170400000	1255000000	2126200000	1421100000	891680000	595490000	2646300000	1007700000	1350400000	1586100000	1386900000	940710000	1158600000	1135300000	15
P07357	P07357	Complement component C8 alpha chain	C8A	sp|P07357|CO8A_HUMAN Complement component C8 alpha chain OS=Homo sapiens GN=C8A PE=1 SV=2	701630000	725680000	604240000	1938800000	1386600000	1066600000	771450000	649940000	903760000	588250000	1279500000	350680000	322970000	404280000	541280000	15
P02748;CON__Q3MHN2;REV__Q4AC99;Q96BY6	P02748	Complement component C9;Complement component C9a;Complement component C9b	C9	sp|P02748|CO9_HUMAN Complement component C9 OS=Homo sapiens GN=C9 PE=1 SV=2	732580000	709100000	754460000	1813800000	1234300000	366920000	990670000	1346700000	1198800000	607330000	792300000	753990000	449840000	418250000	1417800000	15
P00751	P00751	Complement factor B;Complement factor B Ba fragment;Complement factor B Bb fragment	CFB	sp|P00751|CFAB_HUMAN Complement factor B OS=Homo sapiens GN=CFB PE=1 SV=2	11743000000	8171500000	7618900000	16866000000	12343000000	8040400000	12433000000	13343000000	15992000000	13378000000	19628000000	8413900000	7102800000	8526100000	8419900000	15
P08603;Q02985	P08603	Complement factor H	CFH	sp|P08603|CFAH_HUMAN Complement factor H OS=Homo sapiens GN=CFH PE=1 SV=4	8115300000	8800400000	3801000000	5441800000	13491000000	5304200000	9099700000	10737000000	6559400000	3342300000	9009100000	4771800000	12021000000	6773700000	8409900000	15
P05156;CON__Q32PI4	P05156	Complement factor I;Complement factor I heavy chain;Complement factor I light chain	CFI	sp|P05156|CFAI_HUMAN Complement factor I OS=Homo sapiens GN=CFI PE=1 SV=2	311290000	362730000	1527000000	3516900000	3661200000	1194400000	2494600000	1570800000	3098200000	2341700000	3166400000	1150300000	769190000	886980000	560790000	15
P01034	P01034	Cystatin-C	CST3	sp|P01034|CYTC_HUMAN Cystatin-C OS=Homo sapiens GN=CST3 PE=1 SV=1	2307400000	1189600000	3658200000	8894800000	5118900000	2100200000	2849500000	6636500000	6487400000	9584300000	4513700000	775250000	1488100000	948020000	1138900000	15
P02671;CON__P02672	P02671	Fibrinogen alpha chain;Fibrinopeptide A;Fibrinogen alpha chain	FGA	sp|P02671|FIBA_HUMAN Fibrinogen alpha chain OS=Homo sapiens GN=FGA PE=1 SV=2	1782000000	6977000000	113710000	3420500000	31228000000	16391000000	11424000000	31924000000	15663000000	738530000	70243000000	611910000	1524200000	331630000	3494900000	15
P02675	P02675	Fibrinogen beta chain;Fibrinopeptide B;Fibrinogen beta chain	FGB	sp|P02675|FIBB_HUMAN Fibrinogen beta chain OS=Homo sapiens GN=FGB PE=1 SV=2	897320000	4127100000	1459800000	2233400000	12279000000	19177000000	4278100000	8425900000	3900500000	571480000	28445000000	358480000	1223800000	78341000	4618700000	15
P06396	P06396	Gelsolin	GSN	sp|P06396|GELS_HUMAN Gelsolin OS=Homo sapiens GN=GSN PE=1 SV=1	1685900000	1940300000	6151400000	3397300000	1802700000	7865100000	1524200000	1095200000	1943400000	1296700000	1221000000	9568500000	7836000000	3577300000	8744200000	15
P00738	P00738	Haptoglobin;Haptoglobin alpha chain;Haptoglobin beta chain	HP	sp|P00738|HPT_HUMAN Haptoglobin OS=Homo sapiens GN=HP PE=1 SV=1	32422000000	36858000000	136810000000	101590000000	77016000000	53331000000	63393000000	76637000000	49508000000	79285000000	72818000000	71304000000	135200000000	38985000000	177960000000	15
P69905;P02008	P69905	Hemoglobin subunit alpha	HBA1	sp|P69905|HBA_HUMAN Hemoglobin subunit alpha OS=Homo sapiens GN=HBA1 PE=1 SV=2	247050000000	188890000000	157150000000	53367000000	52186000000	13851000000	270220000000	91586000000	177680000000	483550000000	51717000000	241140000000	20104000000	168960000000	78625000000	15
P68871	P68871	Hemoglobin subunit beta;LVV-hemorphin-7;Spinorphin	HBB	sp|P68871|HBB_HUMAN Hemoglobin subunit beta OS=Homo sapiens GN=HBB PE=1 SV=2	152070000000	152200000000	231240000000	47284000000	41002000000	18962000000	323270000000	37547000000	133060000000	351700000000	21982000000	311150000000	32137000000	192770000000	111220000000	15
P02790	P02790	Hemopexin	HPX	sp|P02790|HEMO_HUMAN Hemopexin OS=Homo sapiens GN=HPX PE=1 SV=2	3062600000	3404200000	39926000000	14809000000	12762000000	32478000000	11278000000	6609300000	12103000000	7894800000	9510800000	54471000000	41333000000	25599000000	35126000000	15
P04196	P04196	Histidine-rich glycoprotein	HRG	sp|P04196|HRG_HUMAN Histidine-rich glycoprotein OS=Homo sapiens GN=HRG PE=1 SV=1	4852900000	5524800000	5663200000	8735500000	10294000000	5258100000	8699900000	18472000000	12548000000	15928000000	16180000000	7148600000	3485100000	4875400000	3712300000	15
P01876	P01876	Ig alpha-1 chain C region	IGHA1	sp|P01876|IGHA1_HUMAN Ig alpha-1 chain C region OS=Homo sapiens GN=IGHA1 PE=1 SV=2	24936000000	37331000000	26515000000	60857000000	114290000000	77970000000	96805000000	130610000000	46235000000	47888000000	87776000000	28476000000	55266000000	54783000000	27722000000	15
P01857	P01857	Ig gamma-1 chain C region	IGHG1	sp|P01857|IGHG1_HUMAN Ig gamma-1 chain C region OS=Homo sapiens GN=IGHG1 PE=1 SV=1	19079000000	15448000000	20804000000	9354200000	12229000000	36032000000	19184000000	4754800000	15755000000	11369000000	9512800000	32399000000	57186000000	18582000000	21463000000	15
P01859	P01859	Ig gamma-2 chain C region	IGHG2	sp|P01859|IGHG2_HUMAN Ig gamma-2 chain C region OS=Homo sapiens GN=IGHG2 PE=1 SV=2	21125000000	39834000000	45976000000	81385000000	53690000000	47454000000	63832000000	39469000000	36199000000	22761000000	33568000000	49737000000	75075000000	53984000000	66263000000	15
P01860	P01860	Ig gamma-3 chain C region	IGHG3	sp|P01860|IGHG3_HUMAN Ig gamma-3 chain C region OS=Homo sapiens GN=IGHG3 PE=1 SV=2	87992000000	78753000000	77152000000	58300000000	63896000000	93309000000	69689000000	75191000000	67546000000	56279000000	77601000000	98389000000	233250000000	111040000000	132900000000	15
P01834	P01834	Ig kappa chain C region	IGKC	sp|P01834|IGKC_HUMAN Ig kappa chain C region OS=Homo sapiens GN=IGKC PE=1 SV=1	36437000000	47654000000	44160000000	43998000000	39488000000	68771000000	50526000000	31393000000	34085000000	28939000000	21705000000	69375000000	95502000000	51315000000	66912000000	15
P0CG05	P0CG05	Ig lambda-2 chain C regions	IGLC2	sp|P0CG05|LAC2_HUMAN Ig lambda-2 chain C regions OS=Homo sapiens GN=IGLC2 PE=1 SV=1	38470000000	64635000000	24678000000	31965000000	53494000000	50742000000	36617000000	65033000000	30883000000	26296000000	86312000000	19397000000	40482000000	32692000000	32813000000	15
P24592	P24592	Insulin-like growth factor-binding protein 6	IGFBP6	sp|P24592|IBP6_HUMAN Insulin-like growth factor-binding protein 6 OS=Homo sapiens GN=IGFBP6 PE=1 SV=1	916500000	984730000	1475300000	2068600000	1006700000	932470000	904360000	5168300000	2510800000	3637900000	3650800000	1198800000	583180000	528550000	440580000	15
P19827;CON__Q0VCM5	P19827	Inter-alpha-trypsin inhibitor heavy chain H1	ITIH1	sp|P19827|ITIH1_HUMAN Inter-alpha-trypsin inhibitor heavy chain H1 OS=Homo sapiens GN=ITIH1 PE=1 SV=3	4304900000	4170600000	713620000	1067000000	3571600000	1512600000	4540100000	3676900000	2877900000	1089700000	4504000000	1058000000	2032600000	2614500000	1985400000	15
P19823;CON__Q9TRI1	P19823	Inter-alpha-trypsin inhibitor heavy chain H2	ITIH2	sp|P19823|ITIH2_HUMAN Inter-alpha-trypsin inhibitor heavy chain H2 OS=Homo sapiens GN=ITIH2 PE=1 SV=2	10991000000	10278000000	2521500000	2251700000	7299300000	5192300000	6207400000	5412600000	4745600000	1861600000	7365900000	5847300000	7643300000	12477000000	12209000000	15
Q14624;CON__Q3T052	Q14624	Inter-alpha-trypsin inhibitor heavy chain H4;70 kDa inter-alpha-trypsin inhibitor heavy chain H4;35 kDa inter-alpha-trypsin inhibitor heavy chain H4	ITIH4	sp|Q14624|ITIH4_HUMAN Inter-alpha-trypsin inhibitor heavy chain H4 OS=Homo sapiens GN=ITIH4 PE=1 SV=4	9284000000	7681000000	2390800000	3863700000	10390000000	2569900000	6739900000	11901000000	5586100000	4940300000	13224000000	4066200000	3825300000	5720200000	7033500000	15
P01042;CON__P01045-1;CON__Q2KJ62;CON__P01044-1	P01042	Kininogen-1;Kininogen-1 heavy chain;T-kinin;Bradykinin;Lysyl-bradykinin;Kininogen-1 light chain;Low molecular weight growth-promoting factor	KNG1	sp|P01042|KNG1_HUMAN Kininogen-1 OS=Homo sapiens GN=KNG1 PE=1 SV=2	2982000000	3047700000	8104000000	7721000000	8880500000	7080700000	5667500000	5932400000	5077300000	4954100000	7186400000	5394700000	7134100000	5642400000	5453000000	15
P02750	P02750	Leucine-rich alpha-2-glycoprotein	LRG1	sp|P02750|A2GL_HUMAN Leucine-rich alpha-2-glycoprotein OS=Homo sapiens GN=LRG1 PE=1 SV=2	951200000	879720000	1049900000	2646200000	2088300000	689300000	2289300000	636870000	2051200000	1100800000	976610000	1322000000	847090000	1029100000	1806400000	15
Q96PD5;CON__ENSEMBL:ENSBTAP00000016285	Q96PD5	N-acetylmuramoyl-L-alanine amidase	PGLYRP2	sp|Q96PD5|PGRP2_HUMAN N-acetylmuramoyl-L-alanine amidase OS=Homo sapiens GN=PGLYRP2 PE=1 SV=1	762290000	761930000	1858300000	1687300000	2456300000	1826000000	1758900000	1556600000	2365200000	2400800000	1619400000	2265900000	1369000000	2373900000	1318900000	15
P00747;Q02325;Q15195	P00747	Plasminogen;Plasmin heavy chain A;Activation peptide;Angiostatin;Plasmin heavy chain A, short form;Plasmin light chain B	PLG	sp|P00747|PLMN_HUMAN Plasminogen OS=Homo sapiens GN=PLG PE=1 SV=2	9384800000	8412400000	4825400000	5664800000	5748300000	5880700000	5879600000	7112200000	4245200000	3934300000	9215500000	10027000000	6689600000	6492200000	6679200000	15
P41222	P41222	Prostaglandin-H2 D-isomerase	PTGDS	sp|P41222|PTGDS_HUMAN Prostaglandin-H2 D-isomerase OS=Homo sapiens GN=PTGDS PE=1 SV=1	4493500000	4000600000	10522000000	25963000000	19283000000	6680500000	12489000000	15596000000	29540000000	21346000000	13647000000	4144400000	4628400000	6818400000	4651000000	15
P02760	P02760	Protein AMBP;Alpha-1-microglobulin;Inter-alpha-trypsin inhibitor light chain;Trypstatin	AMBP	sp|P02760|AMBP_HUMAN Protein AMBP OS=Homo sapiens GN=AMBP PE=1 SV=1	10093000000	9918300000	3864900000	5391500000	11942000000	5515900000	4673300000	13253000000	6776500000	5204700000	11731000000	2699400000	4250400000	4139000000	4269800000	15
P00734;CON__P00735	P00734	Prothrombin;Activation peptide fragment 1;Activation peptide fragment 2;Thrombin light chain;Thrombin heavy chain	F2	sp|P00734|THRB_HUMAN Prothrombin OS=Homo sapiens GN=F2 PE=1 SV=2	15223000000	15378000000	8975200000	12278000000	13011000000	7743800000	14981000000	22417000000	16125000000	22682000000	26562000000	5094100000	4695500000	8727000000	4163300000	15
P02753	P02753	Retinol-binding protein 4;Plasma retinol-binding protein(1-182);Plasma retinol-binding protein(1-181);Plasma retinol-binding protein(1-179);Plasma retinol-binding protein(1-176)	RBP4	sp|P02753|RET4_HUMAN Retinol-binding protein 4 OS=Homo sapiens GN=RBP4 PE=1 SV=3	7458500000	7691500000	5101600000	7892500000	13516000000	6647200000	12230000000	8296300000	14917000000	4066900000	16628000000	5123300000	3846000000	5490900000	3225100000	15
P02787;CON__Q29443;CON__Q0IIK2;CON__Q2HJF0	P02787	Serotransferrin	TF	sp|P02787|TRFE_HUMAN Serotransferrin OS=Homo sapiens GN=TF PE=1 SV=3	111960000000	119200000000	335520000000	307230000000	267440000000	283460000000	210950000000	202540000000	232600000000	196780000000	216890000000	336690000000	287790000000	233760000000	256620000000	15
P02774;CON__Q3MHN5;CON__ENSEMBL:ENSBTAP00000018229	P02774	Vitamin D-binding protein	GC	sp|P02774|VTDB_HUMAN Vitamin D-binding protein OS=Homo sapiens GN=GC PE=1 SV=1	41344000000	28089000000	29588000000	34228000000	29727000000	30631000000	18273000000	31244000000	27224000000	23551000000	23525000000	38307000000	28131000000	24325000000	46781000000	15
P04004;CON__Q3ZBS7	P04004	Vitronectin;Vitronectin V65 subunit;Vitronectin V10 subunit;Somatomedin-B	VTN	sp|P04004|VTNC_HUMAN Vitronectin OS=Homo sapiens GN=VTN PE=1 SV=1	8704400000	8326200000	12570000000	6629700000	6232100000	5543200000	9507800000	14394000000	8680500000	11825000000	13969000000	3841000000	4521700000	9394000000	4294800000	15
P25311	P25311	Zinc-alpha-2-glycoprotein	AZGP1	sp|P25311|ZA2G_HUMAN Zinc-alpha-2-glycoprotein OS=Homo sapiens GN=AZGP1 PE=1 SV=2	5653000000	7291600000	11302000000	15859000000	15225000000	10196000000	13106000000	19300000000	17687000000	15528000000	25558000000	10574000000	5884400000	8212300000	7992100000	15
P00748	P00748	Coagulation factor XII;Coagulation factor XIIa heavy chain;Beta-factor XIIa part 1;Coagulation factor XIIa light chain	F12	sp|P00748|FA12_HUMAN Coagulation factor XII OS=Homo sapiens GN=F12 PE=1 SV=3	1806700000	685070000	494690000	293090000	834220000	888370000	361820000	871820000	661680000	999630000	0	1046900000	1160600000	943030000	790960000	14
P02746	P02746	Complement C1q subcomponent subunit B	C1QB	sp|P02746|C1QB_HUMAN Complement C1q subcomponent subunit B OS=Homo sapiens GN=C1QB PE=1 SV=3	413910000	563270000	366320000	207500000	638210000	690050000	426670000	304350000	0	321010000	620830000	233040000	330050000	1068100000	435640000	14
P00736	P00736	Complement C1r subcomponent;Complement C1r subcomponent heavy chain;Complement C1r subcomponent light chain	C1R	sp|P00736|C1R_HUMAN Complement C1r subcomponent OS=Homo sapiens GN=C1R PE=1 SV=2	536910000	383200000	0	403780000	825130000	250180000	656460000	1378200000	560000000	514270000	1301200000	602690000	561670000	618890000	312560000	14
P07358	P07358	Complement component C8 beta chain	C8B	sp|P07358|CO8B_HUMAN Complement component C8 beta chain OS=Homo sapiens GN=C8B PE=1 SV=3	1246900000	1200400000	239310000	708400000	723170000	226810000	412120000	392310000	235560000	0	454940000	660020000	473530000	348780000	366430000	14
P02679	P02679	Fibrinogen gamma chain	FGG	sp|P02679|FIBG_HUMAN Fibrinogen gamma chain OS=Homo sapiens GN=FGG PE=1 SV=3	727290000	2963800000	583580000	1823600000	15323000000	9330400000	5929800000	6945900000	5853100000	1094000000	21208000000	229470000	1398800000	0	6139500000	14
P02751	P02751	Fibronectin;Anastellin;Ugl-Y1;Ugl-Y2;Ugl-Y3	FN1	sp|P02751|FINC_HUMAN Fibronectin OS=Homo sapiens GN=FN1 PE=1 SV=4	535160000	556760000	310360000	280860000	2105800000	1079700000	3013800000	1821600000	523730000	0	4775600000	778720000	2827300000	1425800000	1072400000	14
P02042;P02100	P02042	Hemoglobin subunit delta	HBD	sp|P02042|HBD_HUMAN Hemoglobin subunit delta OS=Homo sapiens GN=HBD PE=1 SV=2	2455500000	3624300000	8221200000	833960000	612770000	0	15327000000	776380000	4743500000	18113000000	231720000	14787000000	716840000	6323100000	1624000000	14
P01861	P01861	Ig gamma-4 chain C region	IGHG4	sp|P01861|IGHG4_HUMAN Ig gamma-4 chain C region OS=Homo sapiens GN=IGHG4 PE=1 SV=1	0	1627900000	27084000000	1675800000	24748000000	11487000000	20123000000	615180000	9081000000	14878000000	434750000	2853400000	14053000000	10017000000	6312700000	14
P06310;A0A075B6S6	P06310;A0A075B6S6	Ig kappa chain V-II region RPMI 6410	IGKV2D-30	sp|P06310|KV230_HUMAN Immunoglobulin kappa variable 2-30 OS=Homo sapiens GN=IGKV2-30 PE=3 SV=2;sp|A0A075B6S6|KVD30_HUMAN Immunoglobulin kappa variable 2D-30 OS=Homo sapiens GN=IGKV2D-30 PE=3 SV=1	683700000	489280000	791370000	739530000	419030000	502660000	617730000	1240800000	820440000	0	513100000	481770000	1057500000	697020000	1507400000	14
P01619	P01619	Ig kappa chain V-III region B6		sp|P01619|KV320_HUMAN Immunoglobulin kappa variable 3-20 OS=Homo sapiens GN=IGKV3-20 PE=1 SV=2	1919400000	1257700000	1898700000	4021800000	0	2351800000	2546600000	6606500000	4791500000	3133600000	5317900000	1071500000	2059000000	3639500000	1506600000	14
P01624	P01624	Ig kappa chain V-III region POM		sp|P01624|KV315_HUMAN Immunoglobulin kappa variable 3-15 OS=Homo sapiens GN=IGKV3-15 PE=1 SV=2	2565100000	2071000000	0	5736300000	4427400000	2084100000	6405500000	8089300000	7436100000	6309900000	9804800000	1836500000	1696000000	5531300000	5060800000	14
P01871	P01871	Ig mu chain C region	IGHM	sp|P01871|IGHM_HUMAN Ig mu chain C region OS=Homo sapiens GN=IGHM PE=1 SV=3	23158000000	14047000000	516610000	0	14586000000	22852000000	22492000000	34444000000	10168000000	3871600000	5038500000	1419200000	21823000000	16935000000	52702000000	14
P36955;CON__Q95121	P36955	Pigment epithelium-derived factor	SERPINF1	sp|P36955|PEDF_HUMAN Pigment epithelium-derived factor OS=Homo sapiens GN=SERPINF1 PE=1 SV=4	1056700000	737860000	2013900000	1671900000	1116200000	1088700000	744760000	172300000	1008500000	1254000000	0	985720000	839340000	355040000	843090000	14
P03952	P03952	Plasma kallikrein;Plasma kallikrein heavy chain;Plasma kallikrein light chain	KLKB1	sp|P03952|KLKB1_HUMAN Plasma kallikrein OS=Homo sapiens GN=KLKB1 PE=1 SV=1	417590000	417860000	194350000	323530000	1416000000	640850000	1212500000	742150000	205250000	0	1002800000	379770000	1056600000	1059300000	1068900000	14
P07225	P07225	Vitamin K-dependent protein S	PROS1	sp|P07225|PROS_HUMAN Vitamin K-dependent protein S OS=Homo sapiens GN=PROS1 PE=1 SV=1	1328800000	1511400000	670280000	825600000	1515000000	1708000000	1887300000	1693000000	1036400000	0	1234100000	546320000	797260000	2374100000	557730000	14
A0A0B4J1V0	A0A0B4J1V0		IGHV3-15	sp|A0A0B4J1V0|HV315_HUMAN Immunoglobulin heavy variable 3-15 OS=Homo sapiens GN=IGHV3-15 PE=3 SV=1	620070000	863730000	837230000	2818800000	3241700000	1892300000	3779100000	2875100000	2672400000	0	1478000000	2728800000	6107700000	2335300000	3489200000	14
P01019	P01019	Angiotensinogen;Angiotensin-1;Angiotensin-2;Angiotensin-3;Angiotensin-4;Angiotensin 1-9;Angiotensin 1-7;Angiotensin 1-5;Angiotensin 1-4	AGT	sp|P01019|ANGT_HUMAN Angiotensinogen OS=Homo sapiens GN=AGT PE=1 SV=1	2827100000	2627700000	1818400000	0	1048000000	2158000000	862660000	0	1404800000	1631400000	1065500000	2119800000	1342500000	1907500000	1551800000	13
O43405	O43405	Cochlin	COCH	sp|O43405|COCH_HUMAN Cochlin OS=Homo sapiens GN=COCH PE=1 SV=1	0	0	2089700000	5863700000	3959400000	445180000	1985200000	5789500000	4634200000	15429000000	3043800000	3001000000	2637000000	1482500000	1773800000	13
P01031;CON__Q1A7A4	P01031	Complement C5;Complement C5 beta chain;Complement C5 alpha chain;C5a anaphylatoxin;Complement C5 alpha chain	C5	sp|P01031|CO5_HUMAN Complement C5 OS=Homo sapiens GN=C5 PE=1 SV=4	916030000	1150900000	0	377070000	649630000	293480000	970850000	934550000	598300000	0	685100000	291190000	1755200000	587750000	2238200000	13
A0A075B6P5;P01615	A0A075B6P5;P01615	Ig kappa chain V-II region FR	IGKV2D-28	sp|A0A075B6P5|KV228_HUMAN Immunoglobulin kappa variable 2-28 OS=Homo sapiens GN=IGKV2-28 PE=3 SV=1;sp|P01615|KVD28_HUMAN Immunoglobulin kappa variable 2D-28 OS=Homo sapiens GN=IGKV2D-28 PE=1 SV=2	0	0	5177700000	4301600000	4073400000	2687500000	4044600000	2448700000	2937300000	2088000000	2708800000	235240000	855600000	2790500000	1156300000	13
P04433	P04433	Ig kappa chain V-III region VG		sp|P04433|KV311_HUMAN Immunoglobulin kappa variable 3-11 OS=Homo sapiens GN=IGKV3-11 PE=1 SV=1	0	0	1352200000	1875900000	1993500000	670070000	1269600000	1117700000	2302100000	2145200000	1685700000	650310000	751130000	1488100000	1434600000	13
Q9Y6R7	Q9Y6R7	IgGFc-binding protein	FCGBP	sp|Q9Y6R7|FCGBP_HUMAN IgGFc-binding protein OS=Homo sapiens GN=FCGBP PE=1 SV=3	0	1785100000	3291900000	3440200000	2391600000	249320000	830090000	1720700000	3127500000	3096700000	1769700000	6045800000	468840000	1042000000	0	13
P01591	P01591	Immunoglobulin J chain	IGJ	sp|P01591|IGJ_HUMAN Immunoglobulin J chain OS=Homo sapiens GN=JCHAIN PE=1 SV=4	7727300000	9131200000	0	234500000	5669700000	3258600000	5574200000	19199000000	2692700000	2483500000	7597500000	0	1327500000	3768100000	2760000000	13
P51884;CON__Q05443	P51884	Lumican	LUM	sp|P51884|LUM_HUMAN Lumican OS=Homo sapiens GN=LUM PE=1 SV=2	0	0	422650000	499810000	487160000	686900000	433450000	550470000	551540000	557070000	728720000	535150000	305660000	596190000	624910000	13
P35542	P35542	Serum amyloid A-4 protein	SAA4	sp|P35542|SAA4_HUMAN Serum amyloid A-4 protein OS=Homo sapiens GN=SAA4 PE=1 SV=2	0	0	707420000	578850000	732810000	831730000	936390000	1286400000	494550000	437200000	730410000	869370000	610040000	1957700000	2055500000	13
P04003	P04003	C4b-binding protein alpha chain	C4BPA	sp|P04003|C4BPA_HUMAN C4b-binding protein alpha chain OS=Homo sapiens GN=C4BPA PE=1 SV=2	6273000000	5990600000	0	0	3217200000	1295300000	2638100000	1333600000	711320000	0	3844200000	160650000	5927300000	3784800000	2641600000	12
P13671	P13671	Complement component C6	C6	sp|P13671|CO6_HUMAN Complement component C6 OS=Homo sapiens GN=C6 PE=1 SV=3	584970000	533750000	828970000	311820000	503100000	737930000	518840000	1198600000	0	0	1442200000	564930000	422380000	0	1459100000	12
Q08380	Q08380	Galectin-3-binding protein	LGALS3BP	sp|Q08380|LG3BP_HUMAN Galectin-3-binding protein OS=Homo sapiens GN=LGALS3BP PE=1 SV=1	181280000	0	1017000000	3110900000	46928000	438180000	0	242830000	301270000	193170000	0	1328900000	332500000	85894000	252960000	12
P0CG06	P0CG06	Ig lambda-3 chain C regions	IGLC3	sp|P0CG06|LAC3_HUMAN Ig lambda-3 chain C regions OS=Homo sapiens GN=IGLC3 PE=1 SV=1	23409000000	12966000000	1018900000	1516400000	1922200000	1112400000	1963400000	12503000000	2202600000	2032600000	12419000000	0	0	940290000	0	12
B9A064;P0CG04	B9A064;P0CG04	Immunoglobulin lambda-like polypeptide 5;Ig lambda-1 chain C regions	IGLL5;IGLC1	sp|B9A064|IGLL5_HUMAN Immunoglobulin lambda-like polypeptide 5 OS=Homo sapiens GN=IGLL5 PE=2 SV=2;sp|P0CG04|LAC1_HUMAN Ig lambda-1 chain C regions OS=Homo sapiens GN=IGLC1 PE=1 SV=1	331190000	384660000	1718800000	352440000	336930000	1245800000	285810000	0	211590000	0	0	358230000	1493700000	1399000000	1196200000	12
P27169	P27169	Serum paraoxonase/arylesterase 1	PON1	sp|P27169|PON1_HUMAN Serum paraoxonase/arylesterase 1 OS=Homo sapiens GN=PON1 PE=1 SV=3	1307500000	1576200000	0	0	177310000	1007600000	161890000	0	384730000	312420000	514800000	144730000	765650000	1007300000	1794300000	12
P04114;CON__ENSEMBL:ENSBTAP00000032840	P04114	Apolipoprotein B-100;Apolipoprotein B-48	APOB	sp|P04114|APOB_HUMAN Apolipoprotein B-100 OS=Homo sapiens GN=APOB PE=1 SV=2	1000400000	1654900000	0	0	1548100000	0	3362500000	871000000	449450000	0	4478400000	534020000	8012000000	2751900000	6705300000	11
O43866	O43866	CD5 antigen-like	CD5L	sp|O43866|CD5L_HUMAN CD5 antigen-like OS=Homo sapiens GN=CD5L PE=1 SV=1	1168900000	640670000	0	0	1119400000	865790000	1366800000	4320900000	394520000	0	178530000	0	486780000	1399400000	1206700000	11
Q03591;Q9BXR6	Q03591	Complement factor H-related protein 1	CFHR1	sp|Q03591|FHR1_HUMAN Complement factor H-related protein 1 OS=Homo sapiens GN=CFHR1 PE=1 SV=2	0	926130000	0	0	1082300000	557520000	575480000	1372700000	326410000	0	1360300000	1209800000	476770000	477730000	375280000	11
Q16610	Q16610	Extracellular matrix protein 1	ECM1	sp|Q16610|ECM1_HUMAN Extracellular matrix protein 1 OS=Homo sapiens GN=ECM1 PE=1 SV=2	0	0	288370000	674390000	399590000	221830000	287580000	0	311890000	0	321340000	196600000	128560000	338660000	187760000	11
P01877	P01877	Ig alpha-2 chain C region	IGHA2	sp|P01877|IGHA2_HUMAN Ig alpha-2 chain C region OS=Homo sapiens GN=IGHA2 PE=1 SV=3	1180300000	2419400000	0	0	2075800000	1414400000	514140000	1528400000	0	0	867960000	450970000	854870000	384200000	208930000	11
P80748	P80748	Ig lambda chain V-III region LOI		sp|P80748|LV321_HUMAN Immunoglobulin lambda variable 3-21 OS=Homo sapiens GN=IGLV3-21 PE=1 SV=2	0	0	152450000	238710000	379670000	333220000	215870000	175800000	307780000	0	0	356850000	751720000	224380000	371890000	11
P00915	P00915	Carbonic anhydrase 1	CA1	sp|P00915|CAH1_HUMAN Carbonic anhydrase 1 OS=Homo sapiens GN=CA1 PE=1 SV=2	3041700000	3486200000	681660000	0	0	0	2177500000	0	566520000	4349600000	0	7999300000	232170000	755650000	1075000000	10
P08185	P08185	Corticosteroid-binding globulin	SERPINA6	sp|P08185|CBG_HUMAN Corticosteroid-binding globulin OS=Homo sapiens GN=SERPINA6 PE=1 SV=1	218260000	392710000	294850000	262750000	254910000	190850000	0	0	0	0	0	682380000	283580000	635480000	341590000	10
P08294	P08294	Extracellular superoxide dismutase [Cu-Zn]	SOD3	sp|P08294|SODE_HUMAN Extracellular superoxide dismutase [Cu-Zn] OS=Homo sapiens GN=SOD3 PE=1 SV=2	328060000	153730000	0	651460000	519070000	0	158120000	902640000	1510600000	898500000	287210000	0	0	84168000	0	10
P23142;CON__ENSEMBL:ENSBTAP00000016046	P23142	Fibulin-1	FBLN1	sp|P23142|FBLN1_HUMAN Fibulin-1 OS=Homo sapiens GN=FBLN1 PE=1 SV=4	1450800000	1204100000	257810000	1039000000	413520000	0	365030000	1649100000	607400000	0	1417100000	0	0	277700000	0	10
P01780;A0A0B4J1V1;P01763;P01762	P01780;A0A0B4J1V1;P01763;P01762	Ig heavy chain V-III region JON;Ig heavy chain V-III region WEA;Ig heavy chain V-III region TRO	IGHV3-21	sp|P01780|HV307_HUMAN Immunoglobulin heavy variable 3-7 OS=Homo sapiens GN=IGHV3-7 PE=1 SV=2;sp|A0A0B4J1V1|HV321_HUMAN Immunoglobulin heavy variable 3-21 OS=Homo sapiens GN=IGHV3-21 PE=1 SV=1;sp|P01763|HV348_HUMAN Immunoglobulin heavy variable 3-48 OS=Homo	258720000	144360000	305510000	0	0	815840000	412290000	0	214740000	0	0	1066300000	2081000000	232970000	2503400000	10
P05155;CON__P50448	P05155	Plasma protease C1 inhibitor	SERPING1	sp|P05155|IC1_HUMAN Plasma protease C1 inhibitor OS=Homo sapiens GN=SERPING1 PE=1 SV=2	964040000	1108100000	856350000	337190000	618900000	266850000	0	0	0	0	0	2187000000	1475200000	1381900000	2266400000	10
P02766	P02766	Transthyretin	TTR	sp|P02766|TTHY_HUMAN Transthyretin OS=Homo sapiens GN=TTR PE=1 SV=1	0	0	1669500000	135670000	299940000	2170800000	520500000	0	292430000	0	0	663530000	1230200000	759970000	368840000	10
P02654	P02654	Apolipoprotein C-I;Truncated apolipoprotein C-I	APOC1	sp|P02654|APOC1_HUMAN Apolipoprotein C-I OS=Homo sapiens GN=APOC1 PE=1 SV=1	715100000	0	698740000	0	663310000	2105900000	1420500000	0	0	0	0	343080000	1540300000	1219900000	1448900000	9
P02655	P02655	Apolipoprotein C-II;Proapolipoprotein C-II	APOC2	sp|P02655|APOC2_HUMAN Apolipoprotein C-II OS=Homo sapiens GN=APOC2 PE=1 SV=1	0	0	166540000	0	400700000	839960000	222490000	0	0	0	418790000	81359000	1294000000	402280000	1760900000	9
O14791	O14791	Apolipoprotein L1	APOL1	sp|O14791|APOL1_HUMAN Apolipoprotein L1 OS=Homo sapiens GN=APOL1 PE=1 SV=5	1697900000	1375300000	0	0	337160000	136100000	314720000	523850000	270310000	0	452050000	0	0	226510000	0	9
O95445	O95445	Apolipoprotein M	APOM	sp|O95445|APOM_HUMAN Apolipoprotein M OS=Homo sapiens GN=APOM PE=1 SV=2	1955000000	3045200000	0	0	389770000	486630000	0	467590000	0	0	453410000	0	422360000	320010000	1345400000	9
P22792	P22792	Carboxypeptidase N subunit 2	CPN2	sp|P22792|CPN2_HUMAN Carboxypeptidase N subunit 2 OS=Homo sapiens GN=CPN2 PE=1 SV=3	626950000	306390000	0	0	170450000	0	247870000	0	161040000	0	247210000	0	119660000	169550000	285550000	9
P04040	P04040	Catalase	CAT	sp|P04040|CATA_HUMAN Catalase OS=Homo sapiens GN=CAT PE=1 SV=3	1507800000	1094200000	456260000	0	0	0	1271700000	532790000	1168000000	1393500000	0	868860000	0	793690000	0	9
Q9NZP8	Q9NZP8	Complement C1r subcomponent-like protein	C1RL	sp|Q9NZP8|C1RL_HUMAN Complement C1r subcomponent-like protein OS=Homo sapiens GN=C1RL PE=1 SV=2	0	0	171320000	239020000	308610000	140000000	208900000	280940000	171110000	0	281690000	0	0	148940000	0	9
Q12805	Q12805	EGF-containing fibulin-like extracellular matrix protein 1	EFEMP1	sp|Q12805|FBLN3_HUMAN EGF-containing fibulin-like extracellular matrix protein 1 OS=Homo sapiens GN=EFEMP1 PE=1 SV=2	472120000	979460000	0	527110000	276380000	79630000	229010000	0	252760000	128320000	0	0	0	151900000	0	9
A0M8Q6	A0M8Q6	Ig lambda-7 chain C region	IGLC7	sp|A0M8Q6|LAC7_HUMAN Ig lambda-7 chain C region OS=Homo sapiens GN=IGLC7 PE=4 SV=2	522490000	972000000	381050000	325210000	354190000	191140000	547480000	0	399900000	0	2941800000	0	0	0	0	9
P07998	P07998	Ribonuclease pancreatic	RNASE1	sp|P07998|RNAS1_HUMAN Ribonuclease pancreatic OS=Homo sapiens GN=RNASE1 PE=1 SV=4	558620000	903370000	0	792670000	537710000	0	441330000	2144400000	955870000	618670000	958850000	0	0	0	0	9
P07360	P07360	Complement component C8 gamma chain	C8G	sp|P07360|CO8G_HUMAN Complement component C8 gamma chain OS=Homo sapiens GN=C8G PE=1 SV=3	338300000	0	0	0	240110000	374380000	162460000	0	0	0	265730000	605650000	420770000	0	376410000	8
O00533	O00533	Neural cell adhesion molecule L1-like protein;Processed neural cell adhesion molecule L1-like protein	CHL1	sp|O00533|NCHL1_HUMAN Neural cell adhesion molecule L1-like protein OS=Homo sapiens GN=CHL1 PE=1 SV=4	0	0	506090000	522580000	0	219030000	295460000	295870000	723930000	692410000	0	641500000	0	0	0	8
P32119	P32119	Peroxiredoxin-2	PRDX2	sp|P32119|PRDX2_HUMAN Peroxiredoxin-2 OS=Homo sapiens GN=PRDX2 PE=1 SV=5	0	993870000	796280000	0	0	0	1000300000	0	445540000	715760000	0	1001100000	0	1074400000	422400000	8
P00739	P00739	Haptoglobin-related protein	HPR	sp|P00739|HPTR_HUMAN Haptoglobin-related protein OS=Homo sapiens GN=HPR PE=2 SV=2	0	0	188000000	0	756380000	1941600000	453670000	0	0	0	0	0	557960000	1099900000	594630000	7
P01704	P01704	Ig lambda chain V-II region TOG		sp|P01704|LV214_HUMAN Immunoglobulin lambda variable 2-14 OS=Homo sapiens GN=IGLV2-14 PE=1 SV=2	0	0	0	235510000	168440000	0	906640000	526930000	674990000	310530000	0	0	0	172200000	0	7
P08571	P08571	Monocyte differentiation antigen CD14;Monocyte differentiation antigen CD14, urinary form;Monocyte differentiation antigen CD14, membrane-bound form	CD14	sp|P08571|CD14_HUMAN Monocyte differentiation antigen CD14 OS=Homo sapiens GN=CD14 PE=1 SV=2	242140000	329530000	0	0	0	0	171310000	0	0	0	0	482850000	120350000	126650000	189560000	7
P10451;CON__P31096	P10451;CON__P31096	Osteopontin	SPP1	sp|P10451|OSTP_HUMAN Osteopontin OS=Homo sapiens GN=SPP1 PE=1 SV=1;	1317300000	1543100000	0	854680000	346050000	0	0	0	394880000	993880000	370600000	0	0	0	0	7
P05452;CON__Q2KIS7	P05452	Tetranectin	CLEC3B	sp|P05452|TETN_HUMAN Tetranectin OS=Homo sapiens GN=CLEC3B PE=1 SV=3	0	0	486400000	444720000	522340000	413680000	514520000	0	0	0	430470000	157690000	0	0	0	7
P08697	P08697	Alpha-2-antiplasmin	SERPINF2	sp|P08697|A2AP_HUMAN Alpha-2-antiplasmin OS=Homo sapiens GN=SERPINF2 PE=1 SV=3	0	0	526570000	0	0	578270000	0	0	0	0	0	2287100000	1442800000	185870000	1418000000	6
P0C0L4;CON__ENSEMBL:ENSBTAP00000007350	P0C0L4	Complement C4-A;Complement C4 beta chain;Complement C4-A alpha chain;C4a anaphylatoxin;C4b-A;C4d-A;Complement C4 gamma chain	C4A	sp|P0C0L4|CO4A_HUMAN Complement C4-A OS=Homo sapiens GN=C4A PE=1 SV=2	0	0	512070000	0	0	194320000	0	0	0	0	0	240750000	141160000	150080000	362650000	6
P63261	P63261	Actin, cytoplasmic 2;Actin, cytoplasmic 2, N-terminally processed	ACTG1	sp|P63261|ACTG_HUMAN Actin, cytoplasmic 2 OS=Homo sapiens GN=ACTG1 PE=1 SV=1	0	0	0	0	0	289670000	0	0	144380000	0	0	1063000000	108300000	0	70609000	5
P01825;P06331;P01824	P01825;P06331;P01824	Ig heavy chain V-II region NEWM;Ig heavy chain V-II region ARH-77;Ig heavy chain V-II region WAH		sp|P01825|HV459_HUMAN Immunoglobulin heavy variable 4-59 OS=Homo sapiens GN=IGHV4-59 PE=1 SV=2;sp|P06331|HV434_HUMAN Immunoglobulin heavy variable 4-34 OS=Homo sapiens GN=IGHV4-34 PE=1 SV=2;sp|P01824|HV439_HUMAN Immunoglobulin heavy variable 4-39 OS=Homo s	0	0	248930000	0	0	236730000	0	0	0	0	0	1392900000	657860000	0	507660000	5
P01772;P01767	P01772;P01767	Ig heavy chain V-III region KOL;Ig heavy chain V-III region BUT		sp|P01772|HV333_HUMAN Immunoglobulin heavy variable 3-33 OS=Homo sapiens GN=IGHV3-33 PE=1 SV=2;sp|P01767|HV353_HUMAN Immunoglobulin heavy variable 3-53 OS=Homo sapiens GN=IGHV3-53 PE=1 SV=2	0	0	994280000	0	0	737520000	0	0	0	0	0	1899700000	1923800000	0	1896800000	5
P01602	P01602	Ig kappa chain V-I region HK102	IGKV1-5	sp|P01602|KV105_HUMAN Immunoglobulin kappa variable 1-5 OS=Homo sapiens GN=IGKV1-5 PE=1 SV=2	397930000	0	0	0	317830000	0	0	0	0	0	0	311390000	210670000	0	554620000	5
P27918	P27918	Properdin	CFP	sp|P27918|PROP_HUMAN Properdin OS=Homo sapiens GN=CFP PE=1 SV=2	346940000	425300000	0	0	297140000	0	0	310470000	0	0	481120000	0	0	0	0	5
P05543;CON__Q9TT36	P05543	Thyroxine-binding globulin	SERPINA7	sp|P05543|THBG_HUMAN Thyroxine-binding globulin OS=Homo sapiens GN=SERPINA7 PE=1 SV=2	0	0	237380000	0	0	134910000	0	0	0	0	0	422070000	152320000	0	194950000	5
O75882	O75882	Attractin	ATRN	sp|O75882|ATRN_HUMAN Attractin OS=Homo sapiens GN=ATRN PE=1 SV=2	0	0	0	0	0	0	0	0	0	0	0	155950000	441120000	94699000	253380000	4
P02730	P02730	Band 3 anion transport protein	SLC4A1	sp|P02730|B3AT_HUMAN Band 3 anion transport protein OS=Homo sapiens GN=SLC4A1 PE=1 SV=3	1766400000	1967500000	557180000	0	0	0	0	0	0	0	0	1657800000	0	0	0	4
P61769	P61769	Beta-2-microglobulin;Beta-2-microglobulin form pI 5.3	B2M	sp|P61769|B2MG_HUMAN Beta-2-microglobulin OS=Homo sapiens GN=B2M PE=1 SV=1	0	0	354080000	0	0	0	0	0	0	0	0	863520000	632880000	0	368260000	4
P00488	P00488	Coagulation factor XIII A chain	F13A1	sp|P00488|F13A_HUMAN Coagulation factor XIII A chain OS=Homo sapiens GN=F13A1 PE=1 SV=4	1047800000	1218900000	0	0	0	0	0	459790000	0	0	918480000	0	0	0	0	4
P11388	P11388	DNA topoisomerase 2-alpha	TOP2A	sp|P11388|TOP2A_HUMAN DNA topoisomerase 2-alpha OS=Homo sapiens GN=TOP2A PE=1 SV=3	0	0	587720000	10470000000	0	0	0	0	0	0	15700000000	0	0	2384300000	0	4
P30043	P30043	Flavin reductase (NADPH)	BLVRB	sp|P30043|BLVRB_HUMAN Flavin reductase (NADPH) OS=Homo sapiens GN=BLVRB PE=1 SV=3	999240000	630680000	0	0	0	0	0	0	336920000	0	304590000	0	0	0	0	4
P04406	P04406	Glyceraldehyde-3-phosphate dehydrogenase	GAPDH	sp|P04406|G3P_HUMAN Glyceraldehyde-3-phosphate dehydrogenase OS=Homo sapiens GN=GAPDH PE=1 SV=3	0	0	0	0	0	0	152600000	0	183410000	171710000	0	452480000	0	0	0	4
Q14520	Q14520	Hyaluronan-binding protein 2;Hyaluronan-binding protein 2 50 kDa heavy chain;Hyaluronan-binding protein 2 50 kDa heavy chain alternate form;Hyaluronan-binding protein 2 27 kDa light chain;Hyaluronan-binding protein 2 27 kDa light chain alternate form	HABP2	sp|Q14520|HABP2_HUMAN Hyaluronan-binding protein 2 OS=Homo sapiens GN=HABP2 PE=1 SV=1	327880000	340970000	0	244060000	338400000	0	0	0	0	0	0	0	0	0	0	4
P01880	P01880	Ig delta chain C region	IGHD	sp|P01880|IGHD_HUMAN Ig delta chain C region OS=Homo sapiens GN=IGHD PE=1 SV=2	0	0	0	219300000	248290000	0	0	360540000	0	0	0	0	0	2380800000	0	4
P06312	P06312	Ig kappa chain V-IV region	IGKV4-1	sp|P06312|KV401_HUMAN Immunoglobulin kappa variable 4-1 OS=Homo sapiens GN=IGKV4-1 PE=1 SV=1	0	0	0	0	0	1058300000	0	0	0	0	0	1882000000	1365700000	0	1035500000	4
P01700	P01700	Ig lambda chain V-I region HA		sp|P01700|LV147_HUMAN Immunoglobulin lambda variable 1-47 OS=Homo sapiens GN=IGLV1-47 PE=1 SV=2	0	0	0	0	0	0	309910000	1607600000	0	0	695160000	0	0	290470000	0	4
Q96L50	Q96L50	Leucine-rich repeat protein 1	LRR1	sp|Q96L50|LLR1_HUMAN Leucine-rich repeat protein 1 OS=Homo sapiens GN=LRR1 PE=1 SV=2	0	0	0	0	162050000	112230000	0	0	0	0	0	0	70871000	0	226860000	4
P16157	P16157	Ankyrin-1	ANK1	sp|P16157|ANK1_HUMAN Ankyrin-1 OS=Homo sapiens GN=ANK1 PE=1 SV=3	294180000	360780000	0	0	0	0	0	0	0	191490000	0	0	0	0	0	3
P08519	P08519	Apolipoprotein(a)	LPA	sp|P08519|APOA_HUMAN Apolipoprotein(a) OS=Homo sapiens GN=LPA PE=1 SV=1	0	0	0	0	1655500000	0	351800000	0	0	0	0	0	0	533820000	0	3
Q96IY4	Q96IY4	Carboxypeptidase B2	CPB2	sp|Q96IY4|CBPB2_HUMAN Carboxypeptidase B2 OS=Homo sapiens GN=CPB2 PE=1 SV=2	0	0	0	0	0	0	0	0	0	0	0	71551000	78567000	0	71807000	3
P15169;CON__Q2KJ83	P15169	Carboxypeptidase N catalytic chain	CPN1	sp|P15169|CBPN_HUMAN Carboxypeptidase N catalytic chain OS=Homo sapiens GN=CPN1 PE=1 SV=1	0	0	0	0	0	179900000	0	0	0	0	0	0	147480000	0	309610000	3
Q8NFZ8	Q8NFZ8	Cell adhesion molecule 4	CADM4	sp|Q8NFZ8|CADM4_HUMAN Cell adhesion molecule 4 OS=Homo sapiens GN=CADM4 PE=1 SV=1	0	0	0	0	0	0	74386000	0	104910000	0	116100000	0	0	0	0	3
P08123	P08123	Collagen alpha-2(I) chain	COL1A2	sp|P08123|CO1A2_HUMAN Collagen alpha-2(I) chain OS=Homo sapiens GN=COL1A2 PE=1 SV=7	0	0	0	106140000	0	0	0	0	0	558820000	0	269990000	0	0	0	3
Q8TD57	Q8TD57	Dynein heavy chain 3, axonemal	DNAH3	sp|Q8TD57|DYH3_HUMAN Dynein heavy chain 3, axonemal OS=Homo sapiens GN=DNAH3 PE=2 SV=1	0	3902200000	0	0	0	186010000	2838900000	0	0	0	0	0	0	0	0	3
P22352	P22352	Glutathione peroxidase 3	GPX3	sp|P22352|GPX3_HUMAN Glutathione peroxidase 3 OS=Homo sapiens GN=GPX3 PE=1 SV=2	0	0	0	0	0	0	0	0	0	0	0	382820000	253820000	0	337120000	3
P05546;CON__ENSEMBL:ENSBTAP00000018574	P05546	Heparin cofactor 2	SERPIND1	sp|P05546|HEP2_HUMAN Heparin cofactor 2 OS=Homo sapiens GN=SERPIND1 PE=1 SV=3	0	0	0	0	0	0	0	0	0	0	0	368770000	469250000	0	717300000	3
P23083	P23083	Ig heavy chain V-I region V35		sp|P23083|HV102_HUMAN Immunoglobulin heavy variable 1-2 OS=Homo sapiens GN=IGHV1-2 PE=1 SV=2	0	0	0	0	0	0	82236000	0	0	0	0	0	152460000	123770000	0	3
P04220	P04220	Ig mu heavy chain disease protein		sp|P04220|MUCB_HUMAN Ig mu heavy chain disease protein OS=Homo sapiens PE=1 SV=1	0	0	0	0	0	0	0	0	0	0	0	0	242460000	481820000	312690000	3
P01344	P01344	Insulin-like growth factor II;Insulin-like growth factor II;Insulin-like growth factor II Ala-25 Del;Preptin	IGF2	sp|P01344|IGF2_HUMAN Insulin-like growth factor II OS=Homo sapiens GN=IGF2 PE=1 SV=1	0	0	0	0	216160000	0	0	433190000	307490000	0	0	0	0	0	0	3
P35858	P35858	Insulin-like growth factor-binding protein complex acid labile subunit	IGFALS	sp|P35858|ALS_HUMAN Insulin-like growth factor-binding protein complex acid labile subunit OS=Homo sapiens GN=IGFALS PE=1 SV=1	0	0	0	0	0	0	0	0	0	0	0	210400000	84303000	0	131180000	3
Q06033;CON__Q0V8M9	Q06033	Inter-alpha-trypsin inhibitor heavy chain H3	ITIH3	sp|Q06033|ITIH3_HUMAN Inter-alpha-trypsin inhibitor heavy chain H3 OS=Homo sapiens GN=ITIH3 PE=1 SV=2	0	0	0	0	221870000	0	263830000	0	0	0	0	0	0	368460000	0	3
P29622	P29622	Kallistatin	SERPINA4	sp|P29622|KAIN_HUMAN Kallistatin OS=Homo sapiens GN=SERPINA4 PE=1 SV=3	0	0	0	0	0	0	0	0	0	0	0	347360000	216760000	0	223400000	3
P14174	P14174	Macrophage migration inhibitory factor	MIF	sp|P14174|MIF_HUMAN Macrophage migration inhibitory factor OS=Homo sapiens GN=MIF PE=1 SV=4	0	0	0	0	0	0	107420000	116320000	121900000	0	0	0	0	0	0	3
P20774	P20774	Mimecan	OGN	sp|P20774|MIME_HUMAN Mimecan OS=Homo sapiens GN=OGN PE=1 SV=1	0	0	0	0	0	0	0	0	0	0	0	110320000	110940000	0	105610000	3
P30041	P30041	Peroxiredoxin-6	PRDX6	sp|P30041|PRDX6_HUMAN Peroxiredoxin-6 OS=Homo sapiens GN=PRDX6 PE=1 SV=3	0	0	0	0	0	0	303580000	155000000	0	361260000	0	0	0	0	0	3
P55058	P55058	Phospholipid transfer protein	PLTP	sp|P55058|PLTP_HUMAN Phospholipid transfer protein OS=Homo sapiens GN=PLTP PE=1 SV=1	0	0	0	0	0	0	0	0	0	0	0	69220000	65607000	0	103730000	3
Q15113	Q15113	Procollagen C-endopeptidase enhancer 1	PCOLCE	sp|Q15113|PCOC1_HUMAN Procollagen C-endopeptidase enhancer 1 OS=Homo sapiens GN=PCOLCE PE=1 SV=2	0	0	0	0	0	0	0	0	0	0	0	153200000	90020000	0	88685000	3
Q13790	Q13790	Apolipoprotein F	APOF	sp|Q13790|APOF_HUMAN Apolipoprotein F OS=Homo sapiens GN=APOF PE=1 SV=2	0	0	0	0	0	0	187400000	0	0	0	0	0	0	0	113170000	2
P20851	P20851	C4b-binding protein beta chain	C4BPB	sp|P20851|C4BPB_HUMAN C4b-binding protein beta chain OS=Homo sapiens GN=C4BPB PE=1 SV=1	0	0	0	0	0	0	0	0	0	0	0	0	219070000	0	147670000	2
P05160	P05160	Coagulation factor XIII B chain	F13B	sp|P05160|F13B_HUMAN Coagulation factor XIII B chain OS=Homo sapiens GN=F13B PE=1 SV=3	0	0	0	0	0	0	0	0	0	0	0	0	180950000	0	123760000	2
P02745	P02745	Complement C1q subcomponent subunit A	C1QA	sp|P02745|C1QA_HUMAN Complement C1q subcomponent subunit A OS=Homo sapiens GN=C1QA PE=1 SV=2	0	0	0	0	0	0	0	0	0	0	0	0	103620000	0	38033000	2
P00746	P00746	Complement factor D	CFD	sp|P00746|CFAD_HUMAN Complement factor D OS=Homo sapiens GN=CFD PE=1 SV=5	0	0	0	0	0	0	0	0	0	0	0	83492000	0	0	75496000	2
P27105	P27105	Erythrocyte band 7 integral membrane protein	STOM	sp|P27105|STOM_HUMAN Erythrocyte band 7 integral membrane protein OS=Homo sapiens GN=STOM PE=1 SV=3	199990000	233720000	0	0	0	0	0	0	0	0	0	0	0	0	0	2
O75636	O75636	Ficolin-3	FCN3	sp|O75636|FCN3_HUMAN Ficolin-3 OS=Homo sapiens GN=FCN3 PE=1 SV=2	0	0	0	0	0	0	0	0	0	0	0	0	99652000	0	157710000	2
P09382	P09382	Galectin-1	LGALS1	sp|P09382|LEG1_HUMAN Galectin-1 OS=Homo sapiens GN=LGALS1 PE=1 SV=2	0	0	0	0	0	0	71586000	139640000	0	0	0	0	0	0	0	2
P01782	P01782	Ig heavy chain V-III region DOB		sp|P01782|HV309_HUMAN Immunoglobulin heavy variable 3-9 OS=Homo sapiens GN=IGHV3-9 PE=1 SV=2	0	0	0	0	0	0	0	0	0	0	0	87358000	121700000	0	0	2
P04430	P04430	Ig kappa chain V-I region BAN		sp|P04430|KV116_HUMAN Immunoglobulin kappa variable 1-16 OS=Homo sapiens GN=IGKV1-16 PE=1 SV=2	0	0	0	0	0	0	203650000	189510000	0	0	0	0	0	0	0	2
P04432;P01597	P04432;P01597	Ig kappa chain V-I region Daudi;Ig kappa chain V-I region DEE		sp|P04432|KVD39_HUMAN Immunoglobulin kappa variable 1D-39 OS=Homo sapiens GN=IGKV1D-39 PE=3 SV=2;sp|P01597|KV139_HUMAN Immunoglobulin kappa variable 1-39 OS=Homo sapiens GN=IGKV1-39 PE=1 SV=2	0	0	0	0	0	0	0	0	413050000	0	720540000	0	0	0	0	2
P01599	P01599	Ig kappa chain V-I region Gal		sp|P01599|KV117_HUMAN Immunoglobulin kappa variable 1-17 OS=Homo sapiens GN=IGKV1-17 PE=1 SV=2	0	0	0	0	0	0	0	0	0	0	0	136560000	105000000	0	0	2
P01701	P01701	Ig lambda chain V-I region NEW		sp|P01701|LV151_HUMAN Immunoglobulin lambda variable 1-51 OS=Homo sapiens GN=IGLV1-51 PE=1 SV=2	0	0	0	0	0	0	0	0	0	0	0	0	617560000	0	389720000	2
P01705	P01705	Ig lambda chain V-II region NEI		sp|P01705|LV223_HUMAN Immunoglobulin lambda variable 2-23 OS=Homo sapiens GN=IGLV2-23 PE=1 SV=2	0	0	155400000	0	0	112200000	0	0	0	0	0	0	0	0	0	2
P01717	P01717	Ig lambda chain V-IV region Hil		sp|P01717|LV325_HUMAN Immunoglobulin lambda variable 3-25 OS=Homo sapiens GN=IGLV3-25 PE=1 SV=2	0	0	0	0	0	0	0	412810000	0	0	513100000	0	0	0	0	2
P35527;CON__P35527	P35527;CON__P35527	Keratin, type I cytoskeletal 9	KRT9	sp|P35527|K1C9_HUMAN Keratin, type I cytoskeletal 9 OS=Homo sapiens GN=KRT9 PE=1 SV=3;	665610000	0	0	0	0	0	0	0	0	156710000	0	0	0	0	0	2
Q8NHW6	Q8NHW6	Otospiralin	OTOS	sp|Q8NHW6|OTOSP_HUMAN Otospiralin OS=Homo sapiens GN=OTOS PE=2 SV=1	0	0	448450000	0	0	325640000	0	0	0	0	0	0	0	0	0	2
P62937;P0DN26;A0A0B4J2A2;A0A075B759;Q9Y536;F5H284	P62937	Peptidyl-prolyl cis-trans isomerase A;Peptidyl-prolyl cis-trans isomerase A, N-terminally processed	PPIA	sp|P62937|PPIA_HUMAN Peptidyl-prolyl cis-trans isomerase A OS=Homo sapiens GN=PPIA PE=1 SV=2	0	0	0	0	0	0	126430000	0	0	0	0	149050000	0	0	0	2
P04180	P04180	Phosphatidylcholine-sterol acyltransferase	LCAT	sp|P04180|LCAT_HUMAN Phosphatidylcholine-sterol acyltransferase OS=Homo sapiens GN=LCAT PE=1 SV=1	0	0	0	0	0	0	0	0	0	0	0	85191000	99936000	0	0	2
P05154	P05154	Plasma serine protease inhibitor	SERPINA5	sp|P05154|IPSP_HUMAN Plasma serine protease inhibitor OS=Homo sapiens GN=SERPINA5 PE=1 SV=3	0	0	0	0	0	52378000	0	0	0	0	0	23913000	0	0	0	2
A0A0A0MS15	A0A0A0MS15		IGHV3-49	sp|A0A0A0MS15|HV349_HUMAN Immunoglobulin heavy variable 3-49 OS=Homo sapiens GN=IGHV3-49 PE=1 SV=1	0	0	286680000	0	0	268130000	0	0	0	0	0	0	0	0	0	2
A0A0C4DH31	A0A0C4DH31		IGHV1-18	sp|A0A0C4DH31|HV118_HUMAN Immunoglobulin heavy variable 1-18 OS=Homo sapiens GN=IGHV1-18 PE=3 SV=1	0	0	115210000	142220000	0	0	0	0	0	0	0	0	0	0	0	2
P62258	P62258	14-3-3 protein epsilon	YWHAE	sp|P62258|1433E_HUMAN 14-3-3 protein epsilon OS=Homo sapiens GN=YWHAE PE=1 SV=1	0	0	0	0	0	0	0	0	0	0	0	45002000	0	0	0	1
P61981;P27348;Q04917;P31946;P31947	P61981;P27348;Q04917;P31946;P31947	14-3-3 protein gamma;14-3-3 protein gamma, N-terminally processed;14-3-3 protein theta;14-3-3 protein eta;14-3-3 protein beta/alpha;14-3-3 protein beta/alpha, N-terminally processed;14-3-3 protein sigma	YWHAG;YWHAQ;YWHAH;YWHAB;SFN	sp|P61981|1433G_HUMAN 14-3-3 protein gamma OS=Homo sapiens GN=YWHAG PE=1 SV=2;sp|P27348|1433T_HUMAN 14-3-3 protein theta OS=Homo sapiens GN=YWHAQ PE=1 SV=1;sp|Q04917|1433F_HUMAN 14-3-3 protein eta OS=Homo sapiens GN=YWHAH PE=1 SV=4;sp|P31946|1433B_HUMAN 14	0	0	0	0	0	0	0	79842000	0	0	0	0	0	0	0	1
P68133;P68032;P63267;P62736	P68133;P68032;P63267;P62736	Actin, alpha skeletal muscle;Actin, alpha cardiac muscle 1;Actin, gamma-enteric smooth muscle;Actin, aortic smooth muscle	ACTA1;ACTC1;ACTG2;ACTA2	sp|P68133|ACTS_HUMAN Actin, alpha skeletal muscle OS=Homo sapiens GN=ACTA1 PE=1 SV=1;sp|P68032|ACTC_HUMAN Actin, alpha cardiac muscle 1 OS=Homo sapiens GN=ACTC1 PE=1 SV=1;sp|P63267|ACTH_HUMAN Actin, gamma-enteric smooth muscle OS=Homo sapiens GN=ACTG2 PE=1	0	0	0	0	0	0	0	0	0	0	0	331650000	0	0	0	1
P60709;Q6S8J3;A5A3E0;P0CG38;Q9BYX7;Q562R1;P0CG39	P60709	Actin, cytoplasmic 1;Actin, cytoplasmic 1, N-terminally processed	ACTB	sp|P60709|ACTB_HUMAN Actin, cytoplasmic 1 OS=Homo sapiens GN=ACTB PE=1 SV=1	0	0	0	0	0	0	27705000	0	0	0	0	0	0	0	0	1
Q15848	Q15848	Adiponectin	ADIPOQ	sp|Q15848|ADIPO_HUMAN Adiponectin OS=Homo sapiens GN=ADIPOQ PE=1 SV=1	0	0	0	0	0	0	0	0	0	0	0	0	48183000	0	0	1
P37840	P37840	Alpha-synuclein	SNCA	sp|P37840|SYUA_HUMAN Alpha-synuclein OS=Homo sapiens GN=SNCA PE=1 SV=1	0	0	0	0	0	0	0	0	0	0	0	5080100	0	0	0	1
P03973	P03973	Antileukoproteinase	SLPI	sp|P03973|SLPI_HUMAN Antileukoproteinase OS=Homo sapiens GN=SLPI PE=1 SV=2	0	0	0	43304000	0	0	0	0	0	0	0	0	0	0	0	1
P98160	P98160	Basement membrane-specific heparan sulfate proteoglycan core protein;Endorepellin;LG3 peptide	HSPG2	sp|P98160|PGBM_HUMAN Basement membrane-specific heparan sulfate proteoglycan core protein OS=Homo sapiens GN=HSPG2 PE=1 SV=4	0	0	0	0	0	0	0	0	183230000	0	0	0	0	0	0	1
O43505	O43505	Beta-1,4-glucuronyltransferase 1	B4GAT1	sp|O43505|B4GA1_HUMAN Beta-1,4-glucuronyltransferase 1 OS=Homo sapiens GN=B4GAT1 PE=1 SV=1	0	0	0	74092000	0	0	0	0	0	0	0	0	0	0	0	1
Q96KN2	Q96KN2	Beta-Ala-His dipeptidase	CNDP1	sp|Q96KN2|CNDP1_HUMAN Beta-Ala-His dipeptidase OS=Homo sapiens GN=CNDP1 PE=1 SV=4	0	0	0	0	0	0	0	0	0	0	0	49493000	0	0	0	1
P43251	P43251	Biotinidase	BTD	sp|P43251|BTD_HUMAN Biotinidase OS=Homo sapiens GN=BTD PE=1 SV=2	0	0	0	0	0	0	0	0	0	0	0	0	68021000	0	0	1
P07738	P07738	Bisphosphoglycerate mutase	BPGM	sp|P07738|PMGE_HUMAN Bisphosphoglycerate mutase OS=Homo sapiens GN=BPGM PE=1 SV=2	0	0	0	0	0	0	0	0	0	0	0	151860000	0	0	0	1
Q9H159	Q9H159	Cadherin-19	CDH19	sp|Q9H159|CAD19_HUMAN Cadherin-19 OS=Homo sapiens GN=CDH19 PE=2 SV=1	0	0	0	63639000	0	0	0	0	0	0	0	0	0	0	0	1
P33151	P33151	Cadherin-5	CDH5	sp|P33151|CADH5_HUMAN Cadherin-5 OS=Homo sapiens GN=CDH5 PE=1 SV=5	0	0	0	0	0	0	0	0	0	0	168530000	0	0	0	0	1
P55285	P55285	Cadherin-6	CDH6	sp|P55285|CADH6_HUMAN Cadherin-6 OS=Homo sapiens GN=CDH6 PE=1 SV=1	0	0	0	38889000	0	0	0	0	0	0	0	0	0	0	0	1
P00918	P00918	Carbonic anhydrase 2	CA2	sp|P00918|CAH2_HUMAN Carbonic anhydrase 2 OS=Homo sapiens GN=CA2 PE=1 SV=2	0	0	0	0	0	0	0	0	0	0	0	516320000	0	0	0	1
Q9NQ79	Q9NQ79	Cartilage acidic protein 1	CRTAC1	sp|Q9NQ79|CRAC1_HUMAN Cartilage acidic protein 1 OS=Homo sapiens GN=CRTAC1 PE=1 SV=2	0	0	0	0	0	0	0	0	0	0	106720000	0	0	0	0	1
CON__ENSEMBL:ENSBTAP00000006074;P49747;P35443	CON__ENSEMBL:ENSBTAP00000006074;P49747;P35443	Cartilage oligomeric matrix protein;Thrombospondin-4	COMP;THBS4	;sp|P49747|COMP_HUMAN Cartilage oligomeric matrix protein OS=Homo sapiens GN=COMP PE=1 SV=2;sp|P35443|TSP4_HUMAN Thrombospondin-4 OS=Homo sapiens GN=THBS4 PE=1 SV=2	0	0	0	0	0	0	0	0	0	0	0	12553000	0	0	0	1
P16070	P16070	CD44 antigen	CD44	sp|P16070|CD44_HUMAN CD44 antigen OS=Homo sapiens GN=CD44 PE=1 SV=3	0	0	0	0	0	0	0	154280000	0	0	0	0	0	0	0	1
P13987	P13987	CD59 glycoprotein	CD59	sp|P13987|CD59_HUMAN CD59 glycoprotein OS=Homo sapiens GN=CD59 PE=1 SV=1	0	0	0	0	0	0	0	0	0	0	0	48684000	0	0	0	1
P43121	P43121	Cell surface glycoprotein MUC18	MCAM	sp|P43121|MUC18_HUMAN Cell surface glycoprotein MUC18 OS=Homo sapiens GN=MCAM PE=1 SV=2	0	0	0	0	0	0	0	0	70498000	0	0	0	0	0	0	1
P36222	P36222	Chitinase-3-like protein 1	CHI3L1	sp|P36222|CH3L1_HUMAN Chitinase-3-like protein 1 OS=Homo sapiens GN=CHI3L1 PE=1 SV=2	0	42848000	0	0	0	0	0	0	0	0	0	0	0	0	0	1
P06276	P06276	Cholinesterase	BCHE	sp|P06276|CHLE_HUMAN Cholinesterase OS=Homo sapiens GN=BCHE PE=1 SV=1	0	0	0	0	0	0	0	0	0	0	0	0	39991000	0	0	1
P00742	P00742	Coagulation factor X;Factor X light chain;Factor X heavy chain;Activated factor Xa heavy chain	F10	sp|P00742|FA10_HUMAN Coagulation factor X OS=Homo sapiens GN=F10 PE=1 SV=2	0	238880000	0	0	0	0	0	0	0	0	0	0	0	0	0	1
P23528	P23528	Cofilin-1	CFL1	sp|P23528|COF1_HUMAN Cofilin-1 OS=Homo sapiens GN=CFL1 PE=1 SV=3	0	0	0	0	0	0	0	0	0	174800000	0	0	0	0	0	1
P02452	P02452	Collagen alpha-1(I) chain	COL1A1	sp|P02452|CO1A1_HUMAN Collagen alpha-1(I) chain OS=Homo sapiens GN=COL1A1 PE=1 SV=5	0	0	0	0	0	0	0	0	0	0	0	86562000	0	0	0	1
P12109	P12109	Collagen alpha-1(VI) chain	COL6A1	sp|P12109|CO6A1_HUMAN Collagen alpha-1(VI) chain OS=Homo sapiens GN=COL6A1 PE=1 SV=3	0	0	0	0	0	0	0	0	0	0	0	0	19258000	0	0	1
P36980	P36980	Complement factor H-related protein 2	CFHR2	sp|P36980|FHR2_HUMAN Complement factor H-related protein 2 OS=Homo sapiens GN=CFHR2 PE=1 SV=1	0	0	0	0	0	0	0	0	0	0	0	70481000	0	0	0	1
Q12860	Q12860	Contactin-1	CNTN1	sp|Q12860|CNTN1_HUMAN Contactin-1 OS=Homo sapiens GN=CNTN1 PE=1 SV=1	0	0	0	0	0	0	0	0	0	0	0	85662000	0	0	0	1
Q9UBP4	Q9UBP4	Dickkopf-related protein 3	DKK3	sp|Q9UBP4|DKK3_HUMAN Dickkopf-related protein 3 OS=Homo sapiens GN=DKK3 PE=1 SV=2	0	0	0	0	0	0	0	0	72463000	0	0	0	0	0	0	1
Q14118	Q14118	Dystroglycan;Alpha-dystroglycan;Beta-dystroglycan	DAG1	sp|Q14118|DAG1_HUMAN Dystroglycan OS=Homo sapiens GN=DAG1 PE=1 SV=2	0	0	0	63198000	0	0	0	0	0	0	0	0	0	0	0	1
Q9UK22	Q9UK22	F-box only protein 2	FBXO2	sp|Q9UK22|FBX2_HUMAN F-box only protein 2 OS=Homo sapiens GN=FBXO2 PE=1 SV=2	0	0	0	0	0	371040000	0	0	0	0	0	0	0	0	0	1
Q9UGM5	Q9UGM5	Fetuin-B	FETUB	sp|Q9UGM5|FETUB_HUMAN Fetuin-B OS=Homo sapiens GN=FETUB PE=1 SV=2	0	0	0	0	0	0	0	0	0	0	0	0	88881000	0	0	1
Q15485	Q15485	Ficolin-2	FCN2	sp|Q15485|FCN2_HUMAN Ficolin-2 OS=Homo sapiens GN=FCN2 PE=1 SV=2	0	0	0	0	0	0	0	0	0	0	0	0	0	29425000	0	1
P04075	P04075	Fructose-bisphosphate aldolase A	ALDOA	sp|P04075|ALDOA_HUMAN Fructose-bisphosphate aldolase A OS=Homo sapiens GN=ALDOA PE=1 SV=2	0	0	0	0	0	0	0	0	0	0	0	43122000	0	0	0	1
P07203	P07203	Glutathione peroxidase 1	GPX1	sp|P07203|GPX1_HUMAN Glutathione peroxidase 1 OS=Homo sapiens GN=GPX1 PE=1 SV=4	0	0	0	0	0	0	0	0	0	0	0	11959000	0	0	0	1
P09211	P09211	Glutathione S-transferase P	GSTP1	sp|P09211|GSTP1_HUMAN Glutathione S-transferase P OS=Homo sapiens GN=GSTP1 PE=1 SV=2	0	0	0	0	0	0	0	0	0	0	0	7383200	0	0	0	1
Q96T91	Q96T91	Glycoprotein hormone alpha-2	GPHA2	sp|Q96T91|GPHA2_HUMAN Glycoprotein hormone alpha-2 OS=Homo sapiens GN=GPHA2 PE=1 SV=1	0	0	0	0	0	0	0	118610000	0	0	0	0	0	0	0	1
P16260	P16260	Graves disease carrier protein	SLC25A16	sp|P16260|GDC_HUMAN Graves disease carrier protein OS=Homo sapiens GN=SLC25A16 PE=1 SV=3	0	0	0	0	0	0	0	0	0	0	0	8325800	0	0	0	1
P0DMV9;P0DMV8;P17066	P0DMV9;P0DMV8;P17066	Heat shock 70 kDa protein 1B;Heat shock 70 kDa protein 1A;Heat shock 70 kDa protein 6	HSPA1B;HSPA1A;HSPA6	sp|P0DMV9|HS71B_HUMAN Heat shock 70 kDa protein 1B OS=Homo sapiens GN=HSPA1B PE=1 SV=1;sp|P0DMV8|HS71A_HUMAN Heat shock 70 kDa protein 1A OS=Homo sapiens GN=HSPA1A PE=1 SV=1;sp|P17066|HSP76_HUMAN Heat shock 70 kDa protein 6 OS=Homo sapiens GN=HSPA6 PE=1 SV	0	0	0	0	0	0	0	0	0	0	0	26470000	0	0	0	1
P69891	P69891	Hemoglobin subunit gamma-1	HBG1	sp|P69891|HBG1_HUMAN Hemoglobin subunit gamma-1 OS=Homo sapiens GN=HBG1 PE=1 SV=2	0	0	0	0	0	0	0	0	0	0	0	520640000	0	0	0	1
Q04756;CON__ENSEMBL:ENSBTAP00000023055	Q04756	Hepatocyte growth factor activator;Hepatocyte growth factor activator short chain;Hepatocyte growth factor activator long chain	HGFAC	sp|Q04756|HGFA_HUMAN Hepatocyte growth factor activator OS=Homo sapiens GN=HGFAC PE=1 SV=1	0	0	0	0	0	0	0	0	0	0	0	0	70688000	0	0	1
P26927;Q2TV78	P26927;Q2TV78	Hepatocyte growth factor-like protein;Hepatocyte growth factor-like protein alpha chain;Hepatocyte growth factor-like protein beta chain;Putative macrophage stimulating 1-like protein	MST1;MST1L	sp|P26927|HGFL_HUMAN Hepatocyte growth factor-like protein OS=Homo sapiens GN=MST1 PE=1 SV=2;sp|Q2TV78|MST1L_HUMAN Putative macrophage stimulating 1-like protein OS=Homo sapiens GN=MST1L PE=2 SV=2	0	0	0	0	0	0	0	0	0	0	0	25205000	0	0	0	1
P01742	P01742	Ig heavy chain V-I region EU		sp|P01742|HV169_HUMAN Immunoglobulin heavy variable 1-69 OS=Homo sapiens GN=IGHV1-69 PE=1 SV=2	0	0	0	0	0	0	0	0	0	0	0	0	304370000	0	0	1
P01766	P01766	Ig heavy chain V-III region BRO		sp|P01766|HV313_HUMAN Immunoglobulin heavy variable 3-13 OS=Homo sapiens GN=IGHV3-13 PE=1 SV=2	0	0	0	0	0	0	0	0	0	0	0	0	0	0	34003000	1
P01768;P01764	P01768;P01764	Ig heavy chain V-III region CAM;Ig heavy chain V-III region 23	IGHV3-23	sp|P01768|HV330_HUMAN Immunoglobulin heavy variable 3-30 OS=Homo sapiens GN=IGHV3-30 PE=1 SV=2;sp|P01764|HV323_HUMAN Immunoglobulin heavy variable 3-23 OS=Homo sapiens GN=IGHV3-23 PE=1 SV=2	0	0	0	0	0	0	0	0	0	0	0	0	0	0	136250000	1
P01594;P01593	P01594;P01593	Ig kappa chain V-I region AU;Ig kappa chain V-I region AG		sp|P01594|KV133_HUMAN Immunoglobulin kappa variable 1-33 OS=Homo sapiens GN=IGKV1-33 PE=1 SV=2;sp|P01593|KVD33_HUMAN Immunoglobulin kappa variable 1D-33 OS=Homo sapiens GN=IGKV1D-33 PE=1 SV=2	0	0	0	0	0	141050000	0	0	0	0	0	0	0	0	0	1
P01601	P01601	Ig kappa chain V-I region HK101		sp|P01601|KVD16_HUMAN Immunoglobulin kappa variable 1D-16 (Fragment) OS=Homo sapiens GN=IGKV1D-16 PE=3 SV=2	0	0	0	0	0	0	0	0	0	0	0	0	0	0	34985000	1
A0A0C4DH73;P01611	A0A0C4DH73;P01611	Ig kappa chain V-I region Wes	IGKV1-12	sp|A0A0C4DH73|KV112_HUMAN Immunoglobulin kappa variable 1-12 OS=Homo sapiens GN=IGKV1-12 PE=3 SV=1;sp|P01611|KVD12_HUMAN Immunoglobulin kappa variable 1D-12 OS=Homo sapiens GN=IGKV1D-12 PE=1 SV=2	0	0	0	0	0	0	0	0	0	0	0	0	54130000	0	0	1
P01703	P01703	Ig lambda chain V-I region NEWM		sp|P01703|LV140_HUMAN Immunoglobulin lambda variable 1-40 OS=Homo sapiens GN=IGLV1-40 PE=1 SV=2	0	0	0	0	0	0	0	303790000	0	0	0	0	0	0	0	1
P01706;P01709	P01706;P01709	Ig lambda chain V-II region BOH;Ig lambda chain V-II region MGC		sp|P01706|LV211_HUMAN Immunoglobulin lambda variable 2-11 OS=Homo sapiens GN=IGLV2-11 PE=1 SV=2;sp|P01709|LV208_HUMAN Immunoglobulin lambda variable 2-8 OS=Homo sapiens GN=IGLV2-8 PE=1 SV=2	0	0	0	0	0	0	0	338560000	0	0	0	0	0	0	0	1
P01714	P01714	Ig lambda chain V-III region SH		sp|P01714|LV319_HUMAN Immunoglobulin lambda variable 3-19 OS=Homo sapiens GN=IGLV3-19 PE=1 SV=2	0	0	0	0	0	0	0	0	0	0	0	0	0	0	71622000	1
P01718	P01718	Ig lambda chain V-IV region Kern		sp|P01718|LV327_HUMAN Immunoglobulin lambda variable 3-27 OS=Homo sapiens GN=IGLV3-27 PE=1 SV=2	0	0	0	0	0	0	0	0	0	0	0	44412000	0	0	0	1
P0CF74	P0CF74	Ig lambda-6 chain C region	IGLC6	sp|P0CF74|LAC6_HUMAN Ig lambda-6 chain C region OS=Homo sapiens GN=IGLC6 PE=4 SV=1	0	309370000	0	0	0	0	0	0	0	0	0	0	0	0	0	1
P15814	P15814	Immunoglobulin lambda-like polypeptide 1	IGLL1	sp|P15814|IGLL1_HUMAN Immunoglobulin lambda-like polypeptide 1 OS=Homo sapiens GN=IGLL1 PE=1 SV=1	0	0	0	0	0	578820000	0	0	0	0	0	0	0	0	0	1
O14498	O14498	Immunoglobulin superfamily containing leucine-rich repeat protein	ISLR	sp|O14498|ISLR_HUMAN Immunoglobulin superfamily containing leucine-rich repeat protein OS=Homo sapiens GN=ISLR PE=2 SV=1	0	0	0	0	0	0	0	0	0	0	0	0	0	0	22163000	1
P18065	P18065	Insulin-like growth factor-binding protein 2	IGFBP2	sp|P18065|IBP2_HUMAN Insulin-like growth factor-binding protein 2 OS=Homo sapiens GN=IGFBP2 PE=1 SV=2	0	0	43365000	0	0	0	0	0	0	0	0	0	0	0	0	1
P17936	P17936	Insulin-like growth factor-binding protein 3	IGFBP3	sp|P17936|IBP3_HUMAN Insulin-like growth factor-binding protein 3 OS=Homo sapiens GN=IGFBP3 PE=1 SV=2	0	0	0	0	88899000	0	0	0	0	0	0	0	0	0	0	1
O60282;P33176;Q12840	O60282;P33176;Q12840	Kinesin heavy chain isoform 5C;Kinesin-1 heavy chain;Kinesin heavy chain isoform 5A	KIF5C;KIF5B;KIF5A	sp|O60282|KIF5C_HUMAN Kinesin heavy chain isoform 5C OS=Homo sapiens GN=KIF5C PE=1 SV=1;sp|P33176|KINH_HUMAN Kinesin-1 heavy chain OS=Homo sapiens GN=KIF5B PE=1 SV=1;sp|Q12840|KIF5A_HUMAN Kinesin heavy chain isoform 5A OS=Homo sapiens GN=KIF5A PE=1 SV=2	0	0	0	0	0	0	0	0	0	0	0	31738000	0	0	0	1
O75829	O75829	Leukocyte cell-derived chemotaxin 1;Chondrosurfactant protein;Chondromodulin-1	LECT1	sp|O75829|LECT1_HUMAN Leukocyte cell-derived chemotaxin 1 OS=Homo sapiens GN=LECT1 PE=1 SV=1	0	0	0	746730000	0	0	0	0	0	0	0	0	0	0	0	1
P18428	P18428	Lipopolysaccharide-binding protein	LBP	sp|P18428|LBP_HUMAN Lipopolysaccharide-binding protein OS=Homo sapiens GN=LBP PE=1 SV=3	0	0	0	0	0	0	0	0	0	0	0	0	0	30914000	0	1
P07195;Q6ZMR3;P07864	P07195	L-lactate dehydrogenase B chain	LDHB	sp|P07195|LDHB_HUMAN L-lactate dehydrogenase B chain OS=Homo sapiens GN=LDHB PE=1 SV=2	0	0	0	0	0	0	0	0	123430000	0	0	0	0	0	0	1
P08637	P08637	Low affinity immunoglobulin gamma Fc region receptor III-A	FCGR3A	sp|P08637|FCG3A_HUMAN Low affinity immunoglobulin gamma Fc region receptor III-A OS=Homo sapiens GN=FCGR3A PE=1 SV=2	0	0	0	0	0	0	0	0	0	0	0	0	0	24080000	0	1
O75015	O75015	Low affinity immunoglobulin gamma Fc region receptor III-B	FCGR3B	sp|O75015|FCG3B_HUMAN Low affinity immunoglobulin gamma Fc region receptor III-B OS=Homo sapiens GN=FCGR3B PE=1 SV=2	0	0	0	0	0	0	0	0	0	0	0	0	0	0	12383000	1
P61626	P61626	Lysozyme C	LYZ	sp|P61626|LYSC_HUMAN Lysozyme C OS=Homo sapiens GN=LYZ PE=1 SV=1	0	0	0	192720000	0	0	0	0	0	0	0	0	0	0	0	1
Q7Z745	Q7Z745	Maestro heat-like repeat-containing protein family member 2B	MROH2B	sp|Q7Z745|MRO2B_HUMAN Maestro heat-like repeat-containing protein family member 2B OS=Homo sapiens GN=MROH2B PE=2 SV=3	0	0	0	0	0	0	0	0	0	0	0	0	0	86541000	0	1
P08493	P08493	Matrix Gla protein	MGP	sp|P08493|MGP_HUMAN Matrix Gla protein OS=Homo sapiens GN=MGP PE=1 SV=2	0	0	0	0	0	0	0	0	0	0	234370000	0	0	0	0	1
P55083	P55083	Microfibril-associated glycoprotein 4	MFAP4	sp|P55083|MFAP4_HUMAN Microfibril-associated glycoprotein 4 OS=Homo sapiens GN=MFAP4 PE=1 SV=2	0	0	0	0	0	0	0	0	0	0	0	0	0	0	29856000	1
Q7Z7M0	Q7Z7M0	Multiple epidermal growth factor-like domains protein 8	MEGF8	sp|Q7Z7M0|MEGF8_HUMAN Multiple epidermal growth factor-like domains protein 8 OS=Homo sapiens GN=MEGF8 PE=1 SV=2	0	0	0	0	0	0	0	27638000	0	0	0	0	0	0	0	1
P58546	P58546	Myotrophin	MTPN	sp|P58546|MTPN_HUMAN Myotrophin OS=Homo sapiens GN=MTPN PE=1 SV=2	0	0	0	0	0	0	0	0	0	0	0	9394900	0	0	0	1
P13591	P13591	Neural cell adhesion molecule 1	NCAM1	sp|P13591|NCAM1_HUMAN Neural cell adhesion molecule 1 OS=Homo sapiens GN=NCAM1 PE=1 SV=3	0	0	0	0	0	0	0	0	0	0	0	168340000	0	0	0	1
P32004	P32004	Neural cell adhesion molecule L1	L1CAM	sp|P32004|L1CAM_HUMAN Neural cell adhesion molecule L1 OS=Homo sapiens GN=L1CAM PE=1 SV=2	0	0	0	25708000	0	0	0	0	0	0	0	0	0	0	0	1
Q92823	Q92823	Neuronal cell adhesion molecule	NRCAM	sp|Q92823|NRCAM_HUMAN Neuronal cell adhesion molecule OS=Homo sapiens GN=NRCAM PE=1 SV=3	0	0	0	0	0	0	0	0	0	0	0	25363000	0	0	0	1
P59666;P59665	P59666;P59665	Neutrophil defensin 3;HP 3-56;Neutrophil defensin 2;Neutrophil defensin 1;HP 1-56;Neutrophil defensin 2	DEFA3;DEFA1	sp|P59666|DEF3_HUMAN Neutrophil defensin 3 OS=Homo sapiens GN=DEFA3 PE=1 SV=1;sp|P59665|DEF1_HUMAN Neutrophil defensin 1 OS=Homo sapiens GN=DEFA1 PE=1 SV=1	0	111400000	0	0	0	0	0	0	0	0	0	0	0	0	0	1
Q6UXB8	Q6UXB8	Peptidase inhibitor 16	PI16	sp|Q6UXB8|PI16_HUMAN Peptidase inhibitor 16 OS=Homo sapiens GN=PI16 PE=1 SV=1	0	0	0	0	0	0	0	0	0	40863000	0	0	0	0	0	1
P30086	P30086	Phosphatidylethanolamine-binding protein 1;Hippocampal cholinergic neurostimulating peptide	PEBP1	sp|P30086|PEBP1_HUMAN Phosphatidylethanolamine-binding protein 1 OS=Homo sapiens GN=PEBP1 PE=1 SV=3	0	0	0	0	0	0	0	0	0	0	0	80978000	0	0	0	1
P80108	P80108	Phosphatidylinositol-glycan-specific phospholipase D	GPLD1	sp|P80108|PHLD_HUMAN Phosphatidylinositol-glycan-specific phospholipase D OS=Homo sapiens GN=GPLD1 PE=1 SV=3	0	0	0	0	0	0	0	0	0	0	0	0	0	0	108370000	1
P00558	P00558	Phosphoglycerate kinase 1	PGK1	sp|P00558|PGK1_HUMAN Phosphoglycerate kinase 1 OS=Homo sapiens GN=PGK1 PE=1 SV=3	0	0	0	0	0	0	0	0	0	0	0	132250000	0	0	0	1
P18669;Q8N0Y7;P15259	P18669;Q8N0Y7	Phosphoglycerate mutase 1;Probable phosphoglycerate mutase 4	PGAM1;PGAM4	sp|P18669|PGAM1_HUMAN Phosphoglycerate mutase 1 OS=Homo sapiens GN=PGAM1 PE=1 SV=2;sp|Q8N0Y7|PGAM4_HUMAN Probable phosphoglycerate mutase 4 OS=Homo sapiens GN=PGAM4 PE=3 SV=1	0	0	0	0	0	0	0	0	0	0	0	30945000	0	0	0	1
P07359	P07359	Platelet glycoprotein Ib alpha chain;Glycocalicin	GP1BA	sp|P07359|GP1BA_HUMAN Platelet glycoprotein Ib alpha chain OS=Homo sapiens GN=GP1BA PE=1 SV=2	0	0	0	0	0	0	0	0	0	0	0	0	0	0	29750000	1
Q6UX71	Q6UX71	Plexin domain-containing protein 2	PLXDC2	sp|Q6UX71|PXDC2_HUMAN Plexin domain-containing protein 2 OS=Homo sapiens GN=PLXDC2 PE=1 SV=1	0	0	0	0	0	0	0	0	0	0	0	0	12332000	0	0	1
P01833	P01833	Polymeric immunoglobulin receptor;Secretory component	PIGR	sp|P01833|PIGR_HUMAN Polymeric immunoglobulin receptor OS=Homo sapiens GN=PIGR PE=1 SV=4	0	0	0	0	0	0	0	0	0	0	0	0	7223900	0	0	1
P20742	P20742	Pregnancy zone protein	PZP	sp|P20742|PZP_HUMAN Pregnancy zone protein OS=Homo sapiens GN=PZP PE=1 SV=4	0	0	0	0	0	0	0	0	0	0	0	0	0	0	315070000	1
Q5JPH6	Q5JPH6	Probable glutamate--tRNA ligase, mitochondrial	EARS2	sp|Q5JPH6|SYEM_HUMAN Probable glutamate--tRNA ligase, mitochondrial OS=Homo sapiens GN=EARS2 PE=1 SV=2	0	0	0	0	0	0	0	0	0	0	0	0	39220000	0	0	1
Q9UHG2	Q9UHG2	ProSAAS;KEP;Big SAAS;Little SAAS;Big PEN-LEN;PEN;Little LEN;Big LEN	PCSK1N	sp|Q9UHG2|PCSK1_HUMAN ProSAAS OS=Homo sapiens GN=PCSK1N PE=1 SV=1	0	0	0	40341000	0	0	0	0	0	0	0	0	0	0	0	1
P07602	P07602	Prosaposin;Saposin-A;Saposin-B-Val;Saposin-B;Saposin-C;Saposin-D	PSAP	sp|P07602|SAP_HUMAN Prosaposin OS=Homo sapiens GN=PSAP PE=1 SV=2	0	0	0	0	0	0	0	0	0	0	0	0	0	0	14946000	1
Q92520	Q92520	Protein FAM3C	FAM3C	sp|Q92520|FAM3C_HUMAN Protein FAM3C OS=Homo sapiens GN=FAM3C PE=1 SV=1	0	0	0	0	0	0	0	0	29225000	0	0	0	0	0	0	1
P23297	P23297	Protein S100-A1	S100A1	sp|P23297|S10A1_HUMAN Protein S100-A1 OS=Homo sapiens GN=S100A1 PE=1 SV=2	0	0	0	0	0	0	0	0	0	0	0	408230000	0	0	0	1
P26447	P26447	Protein S100-A4	S100A4	sp|P26447|S10A4_HUMAN Protein S100-A4 OS=Homo sapiens GN=S100A4 PE=1 SV=1	0	0	0	0	0	0	0	0	0	0	0	57307000	0	0	0	1
P06703	P06703	Protein S100-A6	S100A6	sp|P06703|S10A6_HUMAN Protein S100-A6 OS=Homo sapiens GN=S100A6 PE=1 SV=1	0	0	0	0	0	0	0	0	0	0	0	97068000	0	0	0	1
Q9UK55;CON__ENSEMBL:ENSBTAP00000013050	Q9UK55;CON__ENSEMBL:ENSBTAP00000013050	Protein Z-dependent protease inhibitor	SERPINA10	sp|Q9UK55|ZPI_HUMAN Protein Z-dependent protease inhibitor OS=Homo sapiens GN=SERPINA10 PE=1 SV=1;	0	0	0	0	0	0	0	0	0	0	0	0	0	0	17479000	1
A6NCN2	A6NCN2	Putative keratin-87 protein	KRT87P	sp|A6NCN2|KR87P_HUMAN Putative keratin-87 protein OS=Homo sapiens GN=KRT87P PE=5 SV=4	0	0	36083000	0	0	0	0	0	0	0	0	0	0	0	0	1
P14618	P14618	Pyruvate kinase PKM	PKM	sp|P14618|KPYM_HUMAN Pyruvate kinase PKM OS=Homo sapiens GN=PKM PE=1 SV=4	0	0	0	0	0	0	0	0	0	0	0	16717000	0	0	0	1
Q9UQ26	Q9UQ26	Regulating synaptic membrane exocytosis protein 2	RIMS2	sp|Q9UQ26|RIMS2_HUMAN Regulating synaptic membrane exocytosis protein 2 OS=Homo sapiens GN=RIMS2 PE=1 SV=2	0	0	0	0	0	0	0	0	0	0	0	0	0	0	195870000	1
P00352	P00352	Retinal dehydrogenase 1	ALDH1A1	sp|P00352|AL1A1_HUMAN Retinal dehydrogenase 1 OS=Homo sapiens GN=ALDH1A1 PE=1 SV=2	0	0	0	0	0	0	0	0	0	0	0	8779200	0	0	0	1
Q99969	Q99969	Retinoic acid receptor responder protein 2	RARRES2	sp|Q99969|RARR2_HUMAN Retinoic acid receptor responder protein 2 OS=Homo sapiens GN=RARRES2 PE=1 SV=1	82838000	0	0	0	0	0	0	0	0	0	0	0	0	0	0	1
P34096	P34096	Ribonuclease 4	RNASE4	sp|P34096|RNAS4_HUMAN Ribonuclease 4 OS=Homo sapiens GN=RNASE4 PE=1 SV=3	0	0	0	107970000	0	0	0	0	0	0	0	0	0	0	0	1
Q86VB7	Q86VB7	Scavenger receptor cysteine-rich type 1 protein M130;Soluble CD163	CD163	sp|Q86VB7|C163A_HUMAN Scavenger receptor cysteine-rich type 1 protein M130 OS=Homo sapiens GN=CD163 PE=1 SV=2	0	0	0	133180000	0	0	0	0	0	0	0	0	0	0	0	1
Q13228	Q13228	Selenium-binding protein 1	SELENBP1	sp|Q13228|SBP1_HUMAN Selenium-binding protein 1 OS=Homo sapiens GN=SELENBP1 PE=1 SV=2	0	0	0	0	0	0	0	0	0	0	0	106510000	0	0	0	1
P49908	P49908	Selenoprotein P	SEPP1	sp|P49908|SEPP1_HUMAN Selenoprotein P OS=Homo sapiens GN=SEPP1 PE=1 SV=3	0	0	0	0	0	0	0	0	0	0	0	0	0	0	72855000	1
P0DJI9;P0DJI8	P0DJI9;P0DJI8	Serum amyloid A-2 protein;Serum amyloid A-1 protein;Amyloid protein A;Serum amyloid protein A(2-104);Serum amyloid protein A(3-104);Serum amyloid protein A(2-103);Serum amyloid protein A(2-102);Serum amyloid protein A(4-101)	SAA2;SAA1	sp|P0DJI9|SAA2_HUMAN Serum amyloid A-2 protein OS=Homo sapiens GN=SAA2 PE=1 SV=1;sp|P0DJI8|SAA1_HUMAN Serum amyloid A-1 protein OS=Homo sapiens GN=SAA1 PE=1 SV=1	0	0	0	0	54068000	0	0	0	0	0	0	0	0	0	0	1
P04278	P04278	Sex hormone-binding globulin	SHBG	sp|P04278|SHBG_HUMAN Sex hormone-binding globulin OS=Homo sapiens GN=SHBG PE=1 SV=2	0	0	0	0	0	0	0	0	0	0	0	0	0	0	234110000	1
Q9UBN4	Q9UBN4	Short transient receptor potential channel 4	TRPC4	sp|Q9UBN4|TRPC4_HUMAN Short transient receptor potential channel 4 OS=Homo sapiens GN=TRPC4 PE=1 SV=1	0	0	1248500000	0	0	0	0	0	0	0	0	0	0	0	0	1
A6NMB1	A6NMB1	Sialic acid-binding Ig-like lectin 16	SIGLEC16	sp|A6NMB1|SIG16_HUMAN Sialic acid-binding Ig-like lectin 16 OS=Homo sapiens GN=SIGLEC16 PE=2 SV=3	0	0	0	0	0	0	0	0	0	0	10248000000	0	0	0	0	1
P11166	P11166	Solute carrier family 2, facilitated glucose transporter member 1	SLC2A1	sp|P11166|GTR1_HUMAN Solute carrier family 2, facilitated glucose transporter member 1 OS=Homo sapiens GN=SLC2A1 PE=1 SV=2	0	271260000	0	0	0	0	0	0	0	0	0	0	0	0	0	1
P02549	P02549	Spectrin alpha chain, erythrocytic 1	SPTA1	sp|P02549|SPTA1_HUMAN Spectrin alpha chain, erythrocytic 1 OS=Homo sapiens GN=SPTA1 PE=1 SV=5	0	0	0	0	0	0	0	0	0	0	0	81298000	0	0	0	1
P11277	P11277	Spectrin beta chain, erythrocytic	SPTB	sp|P11277|SPTB1_HUMAN Spectrin beta chain, erythrocytic OS=Homo sapiens GN=SPTB PE=1 SV=5	0	0	0	0	0	0	0	0	0	0	0	74748000	0	0	0	1
P63208	P63208	S-phase kinase-associated protein 1	SKP1	sp|P63208|SKP1_HUMAN S-phase kinase-associated protein 1 OS=Homo sapiens GN=SKP1 PE=1 SV=2	0	0	0	0	0	41676000	0	0	0	0	0	0	0	0	0	1
Q8NDZ2	Q8NDZ2	SUMO-interacting motif-containing protein 1	SIMC1	sp|Q8NDZ2|SIMC1_HUMAN SUMO-interacting motif-containing protein 1 OS=Homo sapiens GN=SIMC1 PE=1 SV=3	0	0	0	75129000	0	0	0	0	0	0	0	0	0	0	0	1
P00441	P00441	Superoxide dismutase [Cu-Zn]	SOD1	sp|P00441|SODC_HUMAN Superoxide dismutase [Cu-Zn] OS=Homo sapiens GN=SOD1 PE=1 SV=2	0	0	0	0	0	0	0	0	0	0	0	66442000	0	0	0	1
Q9P273	Q9P273	Teneurin-3	TENM3	sp|Q9P273|TEN3_HUMAN Teneurin-3 OS=Homo sapiens GN=TENM3 PE=2 SV=3	0	0	0	0	0	0	0	0	0	0	0	0	0	0	89402000	1
P62328	P62328	Thymosin beta-4;Hematopoietic system regulatory peptide	TMSB4X	sp|P62328|TYB4_HUMAN Thymosin beta-4 OS=Homo sapiens GN=TMSB4X PE=1 SV=2	0	0	0	0	0	0	0	0	0	0	0	117590000	0	0	0	1
Q15582	Q15582	Transforming growth factor-beta-induced protein ig-h3	TGFBI	sp|Q15582|BGH3_HUMAN Transforming growth factor-beta-induced protein ig-h3 OS=Homo sapiens GN=TGFBI PE=1 SV=1	0	0	0	0	0	0	0	0	0	0	0	195530000	0	0	0	1
P29401	P29401	Transketolase	TKT	sp|P29401|TKT_HUMAN Transketolase OS=Homo sapiens GN=TKT PE=1 SV=3	0	0	0	0	0	0	0	0	0	0	0	19412000	0	0	0	1
P60174	P60174	Triosephosphate isomerase	TPI1	sp|P60174|TPIS_HUMAN Triosephosphate isomerase OS=Homo sapiens GN=TPI1 PE=1 SV=3	0	0	0	0	0	0	0	0	0	0	0	75733000	0	0	0	1
Q9BQE3;Q71U36;P68363	Q9BQE3;Q71U36;P68363	Tubulin alpha-1C chain;Tubulin alpha-1A chain;Tubulin alpha-1B chain	TUBA1C;TUBA1A;TUBA1B	sp|Q9BQE3|TBA1C_HUMAN Tubulin alpha-1C chain OS=Homo sapiens GN=TUBA1C PE=1 SV=1;sp|Q71U36|TBA1A_HUMAN Tubulin alpha-1A chain OS=Homo sapiens GN=TUBA1A PE=1 SV=1;sp|P68363|TBA1B_HUMAN Tubulin alpha-1B chain OS=Homo sapiens GN=TUBA1B PE=1 SV=1	0	0	0	0	0	0	50950000	0	0	0	0	0	0	0	0	1
P07437;P04350;Q9BVA1;Q13885;P68371;Q3ZCM7;A6NNZ2;Q9BUF5	P07437;P04350;Q9BVA1;Q13885;P68371;Q3ZCM7;A6NNZ2;Q9BUF5	Tubulin beta chain;Tubulin beta-4A chain;Tubulin beta-2B chain;Tubulin beta-2A chain;Tubulin beta-4B chain;Tubulin beta-8 chain;Tubulin beta-8 chain-like protein LOC260334;Tubulin beta-6 chain	TUBB;TUBB4A;TUBB2B;TUBB2A;TUBB4B;TUBB8;TUBB6	sp|P07437|TBB5_HUMAN Tubulin beta chain OS=Homo sapiens GN=TUBB PE=1 SV=2;sp|P04350|TBB4A_HUMAN Tubulin beta-4A chain OS=Homo sapiens GN=TUBB4A PE=1 SV=2;sp|Q9BVA1|TBB2B_HUMAN Tubulin beta-2B chain OS=Homo sapiens GN=TUBB2B PE=1 SV=1;sp|Q13885|TBB2A_HUMAN	0	0	0	0	0	0	0	0	0	0	0	18739000	0	0	0	1
B5MCY1	B5MCY1	Tudor domain-containing protein 15	TDRD15	sp|B5MCY1|TDR15_HUMAN Tudor domain-containing protein 15 OS=Homo sapiens GN=TDRD15 PE=2 SV=1	0	0	0	0	0	0	0	0	0	0	0	0	0	402140000	0	1
P30530	P30530	Tyrosine-protein kinase receptor UFO	AXL	sp|P30530|UFO_HUMAN Tyrosine-protein kinase receptor UFO OS=Homo sapiens GN=AXL PE=1 SV=3	0	0	0	0	0	0	0	0	0	0	0	10957000	0	0	0	1
Q9BRT2	Q9BRT2	Ubiquinol-cytochrome-c reductase complex assembly factor 2	UQCC2	sp|Q9BRT2|UQCC2_HUMAN Ubiquinol-cytochrome-c reductase complex assembly factor 2 OS=Homo sapiens GN=UQCC2 PE=1 SV=1	0	0	0	0	0	0	0	0	180240000	0	0	0	0	0	0	1
P62987;P62979;P0CG47;P0CG48	P62987;P62979;P0CG47;P0CG48	Ubiquitin-60S ribosomal protein L40;Ubiquitin;60S ribosomal protein L40;Ubiquitin-40S ribosomal protein S27a;Ubiquitin;40S ribosomal protein S27a;Polyubiquitin-B;Ubiquitin;Polyubiquitin-C;Ubiquitin	UBA52;RPS27A;UBB;UBC	sp|P62987|RL40_HUMAN Ubiquitin-60S ribosomal protein L40 OS=Homo sapiens GN=UBA52 PE=1 SV=2;sp|P62979|RS27A_HUMAN Ubiquitin-40S ribosomal protein S27a OS=Homo sapiens GN=RPS27A PE=1 SV=2;sp|P0CG47|UBB_HUMAN Polyubiquitin-B OS=Homo sapiens GN=UBB PE=1 SV=1;	0	0	0	0	0	0	0	0	0	0	0	163120000	0	0	0	1
Q13404	Q13404	Ubiquitin-conjugating enzyme E2 variant 1	UBE2V1	sp|Q13404|UB2V1_HUMAN Ubiquitin-conjugating enzyme E2 variant 1 OS=Homo sapiens GN=UBE2V1 PE=1 SV=2	0	0	0	0	0	0	0	28287000	0	0	0	0	0	0	0	1
Q96RL7	Q96RL7	Vacuolar protein sorting-associated protein 13A	VPS13A	sp|Q96RL7|VP13A_HUMAN Vacuolar protein sorting-associated protein 13A OS=Homo sapiens GN=VPS13A PE=1 SV=2	0	0	0	0	0	0	0	0	0	0	0	0	26269000	0	0	1
Q8TEU8	Q8TEU8	WAP, Kazal, immunoglobulin, Kunitz and NTR domain-containing protein 2	WFIKKN2	sp|Q8TEU8|WFKN2_HUMAN WAP, Kazal, immunoglobulin, Kunitz and NTR domain-containing protein 2 OS=Homo sapiens GN=WFIKKN2 PE=1 SV=1	0	0	0	49511000	0	0	0	0	0	0	0	0	0	0	0	1
P08670;P17661;Q16352;P07196;P07197;P12036	P08670	Vimentin	VIM	sp|P08670|VIME_HUMAN Vimentin OS=Homo sapiens GN=VIM PE=1 SV=4	0	0	0	0	0	0	0	0	0	58480000	0	0	0	0	0	1
A0A075B6Q5	A0A075B6Q5		IGHV3-64	sp|A0A075B6Q5|HV364_HUMAN Immunoglobulin heavy variable 3-64 OS=Homo sapiens GN=IGHV3-64 PE=3 SV=1	0	0	0	0	0	0	0	0	0	0	0	0	31829000	0	0	1
A0A0B4J1V2	A0A0B4J1V2		IGHV2-26	sp|A0A0B4J1V2|HV226_HUMAN Immunoglobulin heavy variable 2-26 OS=Homo sapiens GN=IGHV2-26 PE=3 SV=1	0	0	0	0	0	0	0	0	0	0	0	0	0	0	45600000	1
A0A0B4J1X8	A0A0B4J1X8		IGHV3-43	sp|A0A0B4J1X8|HV343_HUMAN Immunoglobulin heavy variable 3-43 OS=Homo sapiens GN=IGHV3-43 PE=3 SV=1	0	0	0	0	0	0	0	0	0	0	0	0	0	0	42434000	1
A0A0C4DH25	A0A0C4DH25		IGKV3D-20	sp|A0A0C4DH25|KVD20_HUMAN Immunoglobulin kappa variable 3-20 OS=Homo sapiens GN=IGKV3D-20 PE=3 SV=1	0	0	0	0	0	0	0	0	0	0	0	0	0	0	190090000	1
A0A0C4DH33	A0A0C4DH33		IGHV1-24	sp|A0A0C4DH33|HV124_HUMAN Immunoglobulin heavy variable 1-24 OS=Homo sapiens GN=IGHV1-24 PE=3 SV=1	0	0	0	0	0	0	0	0	0	0	0	58381000	0	0	0	1
