# Supplementary material for: The proteome of perilymph in patients with vestibular schwannoma. A possibility to identify biomarkers for tumor associated hearing loss?
Source: PLoS One. 2018 Jun 1;13(6):e0198442. doi: 10.1371/journal.pone.0198442 (PMC5983529; doi:10.1371/journal.pone.0198442)
Supplement: S3 Table — (XLSX) [file pone.0198442.s003.xlsx]

## Sheet: Table 8
S3 Table. PANTHER Overrepresentation test of Molecular function (release 20160715)
PANTHER GO-Slim Molecular Function	Perilymph in VS	Expected in Perilymph	Homo sapiens (reflist 20972)	Over/Under Expression	Fold Enrichment	P-value
antigen binding (GO:0003823)	24	1.31	97	+	18.27	2.27e-20
serine-type endopeptidase inhibitor activity (GO:0004867)	28	1.67	123	+	16.81	5.43e-23
antioxidant activity (GO:0016209)	6	0.41	30	+	14.77	0.000738
peptidase inhibitor activity (GO:0030414)	32	2.18	161	+	14.68	1.12e-24
serine-type peptidase activity (GO:0008236)	22	2.65	196	+	8.29	1.37e-11
lipid transporter activity (GO:0005319)	9	1.33	98	+	6.78	0.00171
peptidase activity (GO:0008233)	42	7.11	525	+	5.91	7.76e-18
structural constituent of cytoskeleton (GO:0005200)	41	8.04	594	+	5.1	3.73e-15
structural molecule activity (GO:0005198)	47	12.55	927	+	3.74	1.51e-12
receptor binding (GO:0005102)	46	13.3	982	+	3.46	4.88e-11
hydrolase activity (GO:0016787)	55	28.9	2134	+	1.9	0.000443
protein binding (GO:0005515)	62	38.65	2854	+	1.6	0.0181
nucleic acid binding (GO:0003676)	4	31.82	2350	-	< 0.2	2.9e-08
Unclassified (UNCLASSIFIED)	108	136.08	10049	-	0.79	0
