# Supplementary material for: The proteome of perilymph in patients with vestibular schwannoma. A possibility to identify biomarkers for tumor associated hearing loss?
Source: PLoS One. 2018 Jun 1;13(6):e0198442. doi: 10.1371/journal.pone.0198442 (PMC5983529; doi:10.1371/journal.pone.0198442)
Supplement: S4 Table — (XLSX) [file pone.0198442.s004.xlsx]

## Sheet: S4 Table
S4 Table. PANTHER Overrepresentation test of Cellular component (release 20160715)
PANTHER GO-Slim Cellular Component	Perilymph in VS	Expected in Perilymph	Homo sapiens (reflist 20972)	Over/Under Expression	Fold Enrichment	P-value
tubulin complex (GO:0045298)	8	0.33	24	+	24.62	1.27e-07
intermediate filament cytoskeleton (GO:0045111)	21	0.96	71	+	21.84	1.03e-19
immunoglobulin complex (GO:0019814)	25	1.21	89	+	20.74	4.81e-23
extracellular space (GO:0005615)	65	7.18	530	+	9.06	4.47e-40
extracellular region (GO:0005576)	83	11.27	832	+	7.37	1.57e-45
cytoskeleton (GO:0005856)	40	8.45	624	+	4.73	3.76e-14
microtubule (GO:0005874)	8	1.79	132	+	4.48	0.0303
protein complex (GO:0043234)	34	15.63	1154	+	2.18	0.00123
macromolecular complex (GO:0032991)	39	19.69	1454	+	1.98	0.00233
cytoplasm (GO:0005737)	11	28.28	2088	-	0.39	0.00642
integral to membrane (GO:0016021)	2	15.13	1117	-	< 0.2	0.00154
Unclassified (UNCLASSIFIED)	149	198.65	14669	-	0.75	0
