# Supplementary material for: The proteome of perilymph in patients with vestibular schwannoma. A possibility to identify biomarkers for tumor associated hearing loss?
Source: PLoS One. 2018 Jun 1;13(6):e0198442. doi: 10.1371/journal.pone.0198442 (PMC5983529; doi:10.1371/journal.pone.0198442)
Supplement: S6 Table — (XLSX) [file pone.0198442.s006.xlsx]

## Sheet: S6 Table
S6 Table. PANTHER Overrepresentation test of PANTHER protein class (release 20160715)
PANTHER Protein Class	Perilymph in VS	Expected in Perilymph	Homo sapiens (reflist 20972)	Over/Under Expression	Fold Enrichment	P-value
complement component (PC00078)	8	0.19	14	+	42.2	6.4e-09
tubulin (PC00228)	8	0.33	24	+	24.62	4.24e-07
actin and actin related protein (PC00039)	8	0.41	30	+	19.69	2.36e-06
intermediate filament (PC00129)	21	1.11	82	+	18.91	6.23e-18
serine protease inhibitor (PC00204)	27	1.65	122	+	16.34	9.37e-22
protease inhibitor (PC00191)	42	3.26	241	+	12.87	1.44e-30
apolipoprotein (PC00052)	8	0.69	51	+	11.58	0.000129
structural protein (PC00211)	21	2.25	166	+	9.34	6.15e-12
serine protease (PC00203)	21	3.2	236	+	6.57	4.29e-09
annexin (PC00050)	14	2.22	164	+	6.3	1.65e-05
peptide hormone (PC00179)	13	2.18	161	+	5.96	8.93e-05
transfer/carrier protein (PC00219)	23	4.93	364	+	4.67	3.42e-07
cytoskeletal protein (PC00085)	42	10.54	778	+	3.99	7.14e-12
protease (PC00190)	24	6.23	460	+	3.85	5.65e-06
defense/immunity protein (PC00090)	27	7.6	561	+	3.55	3.87e-06
intracellular calcium-sensing protein (PC00131)	14	4.08	301	+	3.43	0.0158
calmodulin (PC00061)	14	4.08	301	+	3.43	0.0158
extracellular matrix protein (PC00102)	15	4.93	364	+	3.04	0.033
enzyme modulator (PC00095)	46	18.32	1353	+	2.51	1.88e-06
signaling molecule (PC00207)	32	14.67	1083	+	2.18	0.00693
nucleic acid binding (PC00171)	6	32.05	2367	-	< 0.2	1.19e-06
Unclassified (UNCLASSIFIED)	99	134.01	9896	-	0.74	0
