# Supplementary material for: The proteome of perilymph in patients with vestibular schwannoma. A possibility to identify biomarkers for tumor associated hearing loss?
Source: PLoS One. 2018 Jun 1;13(6):e0198442. doi: 10.1371/journal.pone.0198442 (PMC5983529; doi:10.1371/journal.pone.0198442)
Supplement: S7 Table — (XLSX) [file pone.0198442.s007.xlsx]

## Sheet: Confirmed Proteins
Comparison of Edvardsson Rasmussen et al to Lysaght 2011 and Schmitt 2017
Protein IDs	Confirmed "frequntly detected Proteins" in comparison to Lysaght (1) and Schmitt (2)
P43652;CON__REFSEQ:XP_585019	Afamin
P02763	Alpha-1-acid glycoprotein 1
P19652	Alpha-1-acid glycoprotein 2
P01011	Alpha-1-antichymotrypsin;Alpha-1-antichymotrypsin His-Pro-less
P01009	Alpha-1-antitrypsin;Short peptide from AAT
P04217	Alpha-1B-glycoprotein
P02765;CON__P12763	Alpha-2-HS-glycoprotein;Alpha-2-HS-glycoprotein chain A;Alpha-2-HS-glycoprotein chain B
P01023	Alpha-2-macroglobulin
P01008	Antithrombin-III
P02647;CON__P15497	Apolipoprotein A-I;Proapolipoprotein A-I;Truncated apolipoprotein A-I
P02652	Apolipoprotein A-II;Proapolipoprotein A-II;Truncated apolipoprotein A-II
P06727;CON__Q32PJ2	Apolipoprotein A-IV
P02656	Apolipoprotein C-III
P05090	Apolipoprotein D
P02649;CON__Q03247	Apolipoprotein E
P02749;CON__P17690	Beta-2-glycoprotein 1
P00450;CON__ENSEMBL:ENSBTAP00000031900	Ceruloplasmin
P10909;CON__P17697	Clusterin;Clusterin beta chain;Clusterin alpha chain
P02747	Complement C1q subcomponent subunit C
P09871	Complement C1s subcomponent;Complement C1s subcomponent heavy chain;Complement C1s subcomponent light chain
P06681	Complement C2;Complement C2b fragment;Complement C2a fragment
P01024;CON__Q2UVX4;O95568	Complement C3;Complement C3 beta chain;C3-beta-c;Complement C3 alpha chain;C3a anaphylatoxin;Acylation stimulating protein;Complement C3b alpha chain;Complement C3c alpha chain fragment 1;Complement C3dg fragment;Complement C3g fragment;Complement C3d fragment;Complement C3f fragment;Complement C3c alpha chain fragment 2
P0C0L5	Complement C4-B;Complement C4 beta chain;Complement C4-B alpha chain;C4a anaphylatoxin;C4b-B;C4d-B;Complement C4 gamma chain
P10643	Complement component C7
P07357	Complement component C8 alpha chain
P02748;CON__Q3MHN2;REV__Q4AC99;Q96BY6	Complement component C9;Complement component C9a;Complement component C9b
P00751	Complement factor B;Complement factor B Ba fragment;Complement factor B Bb fragment
P08603;Q02985	Complement factor H
P05156;CON__Q32PI4	Complement factor I;Complement factor I heavy chain;Complement factor I light chain
P01034	Cystatin-C
P02671;CON__P02672	Fibrinogen alpha chain;Fibrinopeptide A;Fibrinogen alpha chain
P02675	Fibrinogen beta chain;Fibrinopeptide B;Fibrinogen beta chain
P06396	Gelsolin
P00738	Haptoglobin;Haptoglobin alpha chain;Haptoglobin beta chain
P69905;P02008	Hemoglobin subunit alpha
P68871	Hemoglobin subunit beta;LVV-hemorphin-7;Spinorphin
P02790	Hemopexin
P04196	Histidine-rich glycoprotein
P01876	Ig alpha-1 chain C region
P01857	Ig gamma-1 chain C region
P01859	Ig gamma-2 chain C region
P01860	Ig gamma-3 chain C region
P01834	Ig kappa chain C region
P0CG05	Ig lambda-2 chain C regions
P24592	Insulin-like growth factor-binding protein 6
P19827;CON__Q0VCM5	Inter-alpha-trypsin inhibitor heavy chain H1
P19823;CON__Q9TRI1	Inter-alpha-trypsin inhibitor heavy chain H2
Q14624;CON__Q3T052	Inter-alpha-trypsin inhibitor heavy chain H4;70 kDa inter-alpha-trypsin inhibitor heavy chain H4;35 kDa inter-alpha-trypsin inhibitor heavy chain H4
P01042;CON__P01045-1;CON__Q2KJ62;CON__P01044-1	Kininogen-1;Kininogen-1 heavy chain;T-kinin;Bradykinin;Lysyl-bradykinin;Kininogen-1 light chain;Low molecular weight growth-promoting factor
P02750	Leucine-rich alpha-2-glycoprotein
Q96PD5;CON__ENSEMBL:ENSBTAP00000016285	N-acetylmuramoyl-L-alanine amidase
P00747;Q02325;Q15195	Plasminogen;Plasmin heavy chain A;Activation peptide;Angiostatin;Plasmin heavy chain A, short form;Plasmin light chain B
P41222	Prostaglandin-H2 D-isomerase
P02760	Protein AMBP;Alpha-1-microglobulin;Inter-alpha-trypsin inhibitor light chain;Trypstatin
P00734;CON__P00735	Prothrombin;Activation peptide fragment 1;Activation peptide fragment 2;Thrombin light chain;Thrombin heavy chain
P02753	Retinol-binding protein 4;Plasma retinol-binding protein(1-182);Plasma retinol-binding protein(1-181);Plasma retinol-binding protein(1-179);Plasma retinol-binding protein(1-176)
P02787;CON__Q29443;CON__Q0IIK2;CON__Q2HJF0	Serotransferrin
P02774;CON__Q3MHN5;CON__ENSEMBL:ENSBTAP00000018229	Vitamin D-binding protein
P04004;CON__Q3ZBS7	Vitronectin;Vitronectin V65 subunit;Vitronectin V10 subunit;Somatomedin-B
P25311	Zinc-alpha-2-glycoprotein
P00748	Coagulation factor XII;Coagulation factor XIIa heavy chain;Beta-factor XIIa part 1;Coagulation factor XIIa light chain
P02746	Complement C1q subcomponent subunit B
P00736	Complement C1r subcomponent;Complement C1r subcomponent heavy chain;Complement C1r subcomponent light chain
P07358	Complement component C8 beta chain
P02679	Fibrinogen gamma chain
P02751	Fibronectin;Anastellin;Ugl-Y1;Ugl-Y2;Ugl-Y3
P02042;P02100	Hemoglobin subunit delta
P01861	Ig gamma-4 chain C region
P06310;A0A075B6S6	Ig kappa chain V-II region RPMI 6410
P01619	Ig kappa chain V-III region B6
P01624	Ig kappa chain V-III region POM
P01871	Ig mu chain C region
P36955;CON__Q95121	Pigment epithelium-derived factor
P03952	Plasma kallikrein;Plasma kallikrein heavy chain;Plasma kallikrein light chain
P07225	Vitamin K-dependent protein S
P01019	Angiotensinogen;Angiotensin-1;Angiotensin-2;Angiotensin-3;Angiotensin-4;Angiotensin 1-9;Angiotensin 1-7;Angiotensin 1-5;Angiotensin 1-4
O43405	Cochlin
P01031;CON__Q1A7A4	Complement C5;Complement C5 beta chain;Complement C5 alpha chain;C5a anaphylatoxin;Complement C5 alpha chain
P04433	Ig kappa chain V-III region VG
Q9Y6R7	IgGFc-binding protein
P01591	Immunoglobulin J chain
P51884;CON__Q05443	Lumican
P35542	Serum amyloid A-4 protein
P04003	C4b-binding protein alpha chain
P13671	Complement component C6
Q08380	Galectin-3-binding protein
P0CG06	Ig lambda-3 chain C regions
B9A064;P0CG04	Immunoglobulin lambda-like polypeptide 5;Ig lambda-1 chain C regions
P27169	Serum paraoxonase/arylesterase 1
Protein ID	Unconfirmed proteins
A0A0B4J1V0	Immunoglobulin heavy variable 3-15
A0A075B6P5;P01615	Ig kappa chain V-II region FR
			References	1.	Lysaght AC, Kao S-Y, Paulo JA, Merchant SN, Steen H, Stankovic KM. Proteome of Human Perilymph. J Proteome Res. 2011 Sep 2;10(9):3845–51.
				2.	Schmitt HA, Pich A, Schröder A, Scheper V, Lilli G, Reuter G, et al. Proteome Analysis of Human Perilymph Using an Intraoperative Sampling Method. J Proteome Res. 2017 May 5;16(5):1911–23.

## Sheet: Normal proteome
Proteins confirmed from the list of "normal proteome" by Lysaght et al (1)
afamin
alpha-1-B glycoprotein
alpha-1-microglobulin/bikunin precursor
alpha-2-glycoprotein 1, zinc-binding
alpha-2-HS-glycoprotein
alpha-2-macroglobulin
angiotensinogen
apolipoprotein A-I
apolipoprotein A-II
apolipoprotein D
apolipoprotein E
apolipoprotein H (beta-2-glycoprotein I)
ceruloplasmin (ferroxidase)
coagulation factor C homolog, cochlin (Limulus polyphemus)
coagulation factor II (thrombin)
complement component 3
complement component 4B
complement component 7
complement factor B
complement factor H
complement factor I
cystatin C
Fc fragment of IgG binding protein
fibrinogen alpha chain
fibrinogen gamma chain
gelsolin (amyloidosis, Finnish type)
glutathione peroxidase 3 (plasma)
group-specific component (vitamin D binding protein)
haptoglobin
hemoglobin, beta
hemoglobin, delta
hemopexin
histidine-rich glycoprotein
immunoglobulin heavy constant alpha 1
immunoglobulin heavy constant gamma 1 (G1m marker)
immunoglobulin heavy constant gamma 4
immunoglobulin heavy constant mu
immunoglobulin lambda constant 2
inter-alpha trypsin inhibitor H1
inter-alpha trypsin inhibitor H2
inter-alpha trypsin inhibitor H4
kininogen 1
orosomucoid 1
orosomucoid 2
plasminogen
prostaglandin D2 synthase 21kDa (brain)
retinol binding protein 4, plasma
serpin peptidase inhibitor, clade A (antichymotrypsin), member 3
serpin peptidase inhibitor, clade A (antitrypsin), member 1
serpin peptidase inhibitor, clade C (antithrombin), member 1
transferrin
Unconfirmed proteins
apolipoprotein B
carbonic anhydrase II
albumin
clusterin (apolipoprotein J)
keratin 5
carbonic anhydrase I
Anti-(ED-B) single-chain Fv fragment
biliverdin reductase B (flavin reductase (NADPH))
hemoglobin, alpha 2
heparan sulfate proteoglycan 2
immunoglobulin kappa variable 1-5
immunoglobulin kappa variable 4-1
keratin 1
keratin 10
keratin 9
transthyretin
spectrin, beta, erythrocytic
peroxiredoxin 2
serpin peptidase inhibitor, clade G (C1 inhibitor), member 1
serpin peptidase inhibitor, clade F (alpha-2 antiplasmin), member 1
		References	1.	Lysaght AC, Kao S-Y, Paulo JA, Merchant SN, Steen H, Stankovic KM. Proteome of Human Perilymph. J Proteome Res. 2011 Sep 2;10(9):3845–51.
